1           **Separable, Ctf4-mediated recruitment of DNA Polymerase  $\alpha$  for initiation of DNA**  
2           **synthesis at replication origins and lagging-strand priming during replication elongation**

3  
4  
5

6 Sarina Y. Porcella<sup>1</sup>, Natasha C. Koussa, Colin P. Tang<sup>1,2</sup>, Daphne N. Kramer<sup>1</sup>, Priyanka  
7 Srivastava<sup>1,3</sup>, Duncan J. Smith<sup>1,4</sup>

8

9 1. Department of Biology, New York University, New York, NY 10003, USA

10 2. Present address: Weill-Cornell Graduate School of Medical Sciences, New York, NY 10065,  
11 USA

12 3. Present address: School of Dentistry, UCSF Center for the Health Sciences, San Francisco,  
13 CA 94143

14

15 4. Corresponding author: [duncan.smith@nyu.edu](mailto:duncan.smith@nyu.edu)

16

17

18 Keywords: DNA replication, Lagging-strand synthesis, Replication origins, Checkpoint activation

19

20 **Abstract**

21 During eukaryotic DNA replication, DNA polymerase alpha/primase (Pol  $\alpha$ ) initiates synthesis on  
22 both the leading and lagging strands. It is unknown whether leading- and lagging-strand priming  
23 are mechanistically identical, and whether Pol  $\alpha$  associates processively or distributively with  
24 the replisome. Here, we titrate cellular levels of Pol  $\alpha$  in *S. cerevisiae* and analyze Okazaki  
25 fragments to study both replication initiation and ongoing lagging-strand synthesis *in vivo*. We  
26 observe that both Okazaki fragment initiation and the productive firing of replication origins are  
27 sensitive to Pol  $\alpha$  abundance, and that both processes are disrupted at similar Pol  $\alpha$   
28 concentrations. When the replisome adaptor protein Ctf4 is absent or cannot interact with Pol  $\alpha$ ,  
29 lagging-strand initiation is impaired at Pol  $\alpha$  concentrations that still support normal origin firing.  
30 Additionally, we observe that activation of the checkpoint becomes essential for viability upon  
31 severe depletion of Pol  $\alpha$ . Using strains in which the Pol  $\alpha$ -Ctf4 interaction is disrupted, we  
32 demonstrate that this checkpoint requirement is not solely caused by reduced lagging-strand  
33 priming. Our results suggest that Pol  $\alpha$  recruitment for replication initiation and ongoing lagging-  
34 strand priming are distinctly sensitive to the presence of Ctf4. We propose that the global  
35 changes we observe in Okazaki fragment length and origin firing efficiency are consistent with  
36 distributive association of Pol  $\alpha$  at the replication fork, at least when Pol  $\alpha$  is limiting.

37

38

39 **Author summary**

40 Half of each eukaryotic genome is replicated continuously as the leading strand, while the other  
41 half is synthesized discontinuously as Okazaki fragments on the lagging strand. The bulk of  
42 DNA replication is completed by DNA polymerases  $\epsilon$  and  $\delta$  on the leading and lagging strand  
43 respectively, while synthesis on each strand is initiated by DNA polymerase  $\alpha$ -primase (Pol  $\alpha$ ).  
44 Using the model eukaryote *S. cerevisiae*, we modulate cellular levels of Pol  $\alpha$  and interrogate  
45 the impact of this perturbation on both replication initiation on DNA synthesis and cellular  
46 viability. We observe that Pol  $\alpha$  can associate dynamically at the replication fork for initiation on  
47 both strands. Although the initiation of both strands is widely thought to be mechanistically  
48 similar, we determine that Ctf4, a hub that connects proteins to the replication fork, stimulates  
49 lagging-strand priming to a greater extent than leading-strand initiation. We also find that  
50 decreased leading-strand initiation results in a checkpoint response that is necessary for  
51 viability when Pol  $\alpha$  is limiting. Because the DNA replication machinery is highly conserved from  
52 budding yeast to humans, this research provides insights into how DNA replication is  
53 accomplished throughout eukaryotes.

54

55

## 56 **Introduction**

57 DNA polymerase alpha/primase (Pol  $\alpha$ ) is responsible for initiating synthesis on the leading  
58 strand and for each Okazaki fragment on the lagging strand (Kunkel and Burgers, 2008). The  
59 ultimate contribution of Pol  $\alpha$  to replication is limited, and bulk synthesis on the leading- and  
60 lagging-strands is carried out by DNA polymerase epsilon (Pol  $\epsilon$ ) and polymerase delta (Pol  $\delta$ ),  
61 respectively (Clausen et al., 2015; Daigaku et al., 2015; Pursell et al., 2007; Reijns et al., 2015).  
62 Despite the fact that different DNA polymerases carry out the majority of DNA synthesis on the  
63 two daughter strands, Pol  $\alpha$  hands off synthesis predominantly to Pol  $\delta$  during normal initiation  
64 on both strands and during replication restart (Daigaku et al., 2015; Garbacz et al., 2018; Yeeles  
65 et al., 2017; Miyabe et al., 2015). The use of the same initiating polymerase and downstream  
66 partner implies a possible similarity between leading- and lagging-strand initiation. Indeed,  
67 recent evidence from reconstituted replisomes suggests that leading-strand initiation can occur  
68 via extension of the first Okazaki fragment synthesized on the lagging strand (Aria and Yeeles,  
69 2018). However, analysis of repriming during damage bypass in the same reconstituted system  
70 implies that leading- and lagging-strand repriming may be mechanistically distinct (Taylor and  
71 Yeeles, 2018).

72

73 Eukaryotic Okazaki fragments are considerably shorter than their prokaryotic  
74 counterparts (Balakrishnan and Bambara, 2013; Ogawa and Okazaki, 1980). Okazaki fragment  
75 length is quantized by the nucleosome repeat via interactions between nascent nucleosomes  
76 and Pol  $\delta$  in *S. cerevisiae* (Smith and Whitehouse, 2012) and *C. elegans* (Pourkarimi et al.,  
77 2016). Okazaki fragment termini can also be positioned by nucleosomes in a reconstituted *S.*

78 *cerevisiae* replication reaction (Devbhandari et al., 2017). Both the distribution of Okazaki  
79 fragment termini with respect to nucleosomes and the overall length profile of lagging-strand  
80 products in *S. cerevisiae* and *C. elegans* are remarkably similar. Despite this apparent size  
81 conservation, Okazaki fragment length can be altered on naked and non-chromatinized  
82 templates *in vitro* by varying the concentration of Pol  $\alpha$  (Kurat et al., 2017), analogous to the  
83 impact of primase titration on lagging-strand synthesis in a reconstituted *E. coli* replication  
84 system (Wu et al., 1992). Eukaryotic Okazaki fragment length can also be increased *in vivo* by  
85 impairing nucleosome assembly (Smith and Whitehouse, 2012; Yadav and Whitehouse, 2016).  
86  
87 The maximum length of an Okazaki fragment is determined by the amount of single-stranded  
88 DNA unwound at the replication fork before lagging-strand priming and extension. Thus, longer  
89 fragments would result in the exposure of long stretches of damage-prone single-stranded DNA.  
90 Shorter Okazaki fragments would expose shorter stretches of ssDNA, but at the likely cost of  
91 increasing the contribution of the error-prone Pol  $\alpha$  to synthesis of the lagging daughter strand  
92 (Kunkel, 2011; Reijns et al., 2015). However, it is currently unclear to what extent changing  
93 Okazaki fragment length directly impacts cellular fitness. Reduced DNA polymerase activity  
94 upon aphidicolin treatment induces chromosome breakage and genomic rearrangements at  
95 fragile sites in mammals (Glover et al., 1984). Analogously, reducing the intracellular  
96 concentration of Pol  $\alpha$  in *S. cerevisiae* increases S-phase duration, sensitivity to DNA damaging  
97 agents, and chromosomal rearrangements at defined sites (Lemoine et al., 2005; Song et al.,  
98 2014). The detrimental effects of Pol  $\alpha$  depletion on genome integrity could arise due to  
99 defective leading- or lagging-strand initiation, both of which are dependent on Pol  $\alpha$ .

100

101 Ctf4 was originally identified as a chromosome transmission fidelity mutant (Kouprina et al.,  
102 1992). Subsequent studies have identified multiple roles for Ctf4 in DNA metabolism. Ctf4 is not  
103 only required for the establishment of sister chromatin cohesion (Borges et al., 2013; Hanna et  
104 al., 2001), but also links Pol  $\alpha$  to the replication fork via interaction with the replicative helicase  
105 (Gambus et al., 2009; Tanaka et al., 2009), and is required for error-free lesion bypass  
106 (Fumasoni et al., 2015) and rDNA maintenance (Villa et al., 2016). At least some of these roles  
107 for Ctf4 are independent of Pol  $\alpha$  binding. The metazoan Ctf4 ortholog, AND-1 also stimulates  
108 Pol  $\alpha$  binding to chromatin, and is required for efficient DNA replication (Zhu et al., 2007).  
109 Interestingly, despite the conserved contribution of Ctf4 to Pol  $\alpha$  recruitment, *ctf4 $\Delta$*  *S. cerevisiae*  
110 strains have been demonstrated to synthesize identically sized Okazaki fragments to wild-type  
111 cells (Borges et al., 2013). Additionally, the Ctf4 protein has a minimal effect on the priming of  
112 either DNA strand in reconstituted replication reactions (Kurat et al., 2017). Thus, the  
113 contributions of Ctf4 to Pol  $\alpha$  recruitment for origin firing and Okazaki fragment initiation have  
114 not been fully elucidated *in vivo*.

115

116 Here, we analyze Okazaki fragments to directly test the effects of Pol  $\alpha$  depletion on origin firing  
117 efficiency and Okazaki fragment initiation in *S. cerevisiae*. We find that reduced levels of Pol  $\alpha$   
118 lead to an increase in Okazaki fragment length and a global decrease in replication-origin firing  
119 efficiency. In the absence of a Ctf4-Pol1 interaction, lagging-strand initiation is impaired at  
120 moderate Pol  $\alpha$  concentrations that support normal levels of origin firing. Impaired Okazaki  
121 fragment initiation is well tolerated: however, a severe reduction in Pol  $\alpha$  levels leads to a strict  
122 dependence on checkpoint activation for continued viability.

123

124 **Results**

125

126 **Cells with reduced levels of Pol  $\alpha$  synthesize longer Okazaki fragments *in vivo*.**

127

128 To investigate the effect of Pol1 depletion on leading- and lagging-strand priming during  
129 replication, we modified the approach of Petes and co-workers (Lemoine et al., 2005; Song et  
130 al., 2014), limiting expression of *POL1* by replacing its promoter with *pGAL1*. Expression of Pol1  
131 from galactose-inducible promoters generates a stable polypeptide that can persist for several  
132 cell cycles (Muzi Falconi et al., 1993). Therefore, to facilitate turnover of pre-existing Pol1 and  
133 focus on the acute effects of depletion, we additionally fused an N-terminal degron to the *POL1*  
134 coding sequence. Western-blot analysis indicated that the concentration of this GAL1-  
135 expressed, degron-tagged Pol1 (GDPol1) could be specifically and rapidly modulated within 4h  
136 (Fig. 1A). The lower band marked with an asterisk in GDPol1-myc Western blots is a  
137 degradation product resulting from degron-tagging (see Fig. S1A). All cultures were grown in  
138 media supplemented with 3% raffinose to avoid indirect effects due to carbon limitation. Pol1  
139 levels oscillate through the cell cycle when the protein is endogenously expressed, but not when  
140 expression is driven by galactose (Muzi Falconi et al., 1993). Because Pol1 concentration is not  
141 constant even within S-phase (Muzi Falconi et al., 1993), and only 2/3 of cells in an  
142 asynchronous population are in G1, G2 or M phase, we compared wild-type POL1 expression  
143 during S phase to 0.5% and 0.05% galactose in our inducible system at the zero and 60 minute  
144 timepoints after release from alpha-factor-mediated G1 arrest (Fig. S1A). We estimate that the  
145 expression level at 0.05% galactose is slightly lower than endogenous during the relevant phase  
146 of the cell cycle, consistent with several phenotypes described below. However, we note that  
147 the concentration of free Pol  $\alpha$  might vary through the cell cycle as the complex associates with  
148 elongating replication forks, especially under limiting conditions.

149  
150 To analyze Okazaki fragment biogenesis, we crossed the *GDPOL1* allele into a strain  
151 background in which DNA ligase I (Cdc9) can be depleted from the nucleus by rapamycin  
152 treatment using the anchor away method (Haruki et al., 2008). Nuclear depletion of Cdc9  
153 enriches nucleosome-sized Okazaki fragments (Fig. S1B), similarly to transcriptional repression  
154 of Cdc9 (Smith and Whitehouse, 2012; Yadav and Whitehouse, 2016). Robust detection of  
155 Okazaki fragments was possible after 1h rapamycin treatment: therefore, all Okazaki fragment  
156 labeling and sequencing experiments were conducted after a 4h sugar switch to reduce Pol  $\alpha$   
157 levels, followed by 1h ligase depletion by rapamycin (Fig. 1B).

158  
159 By end-labeling unligated Okazaki fragments, we observed that cells with wild-type *POL1* did  
160 not show an increase in Okazaki fragment length under low-galactose growth conditions (Fig.  
161 1C). This result was highly reproducible (another representative gel is shown in Fig. S1C). By  
162 contrast, in the *GDPOL1* strain Okazaki fragment length was normal at Pol1 concentrations  
163 down to a critical concentration corresponding to growth in 0.014% galactose (Fig. 1D,  
164 representative replicate experiments are shown in Fig. S1D-E). At 0.014% galactose the  
165 Okazaki fragment length profile was shifted slightly upwards such that fragments were clearly  
166 still phased by nucleosomes, while lower galactose concentrations (0.005%) showed a  
167 significant loss of signal (Fig. 1D cf. lanes 5&6). To confirm that this loss of signal reflected a  
168 further length increase (and therefore a reduction in the number of ends being labeled), we  
169 analyzed Okazaki fragments by Southern blot using a whole-genome probe: as anticipated for  
170 severely perturbed lagging-strand priming, Okazaki fragments at 0.005% galactose were  
171 significantly larger than at 0.014% (Fig. 1E). We conclude that limiting levels of Pol  $\alpha$  lead to  
172 reduced priming frequency on the lagging strand, resulting in longer Okazaki fragments, and



173 that *S. cerevisiae* cells can sustain growth when Okazaki fragment length is substantially  
174 increased. These data are consistent with the presence of multiple Pol  $\alpha$  complexes at the  
175 replication fork and/or the repeated, distributive recruitment of Pol  $\alpha$  to the replisome for lagging-  
176 strand priming during replication, since the priming kinetics of a single Pol  $\alpha$  complex stably  
177 associated with the replisome would be unaffected by cellular Pol  $\alpha$  concentrations (see  
178 discussion).

179  
180 To analyze the location of Okazaki fragment termini, we purified and sequenced Okazaki  
181 fragments (Smith and Whitehouse, 2012) from wild-type and *GDPOL1* strains shifted to low  
182 galactose concentrations for 4h before 1h ligase depletion. Galactose concentration does not  
183 significantly affect the distribution of Okazaki fragment termini in wild-type cells (Fig. 1F).  
184 However, we observed that both the 5' (Fig. 1G) and 3' (Fig. S1F) termini of Okazaki fragments  
185 in *GDPOL1* cells were less enriched at nucleosome dyads during growth at concentrations  
186 below 0.041% galactose (Fig. 1G). Pol1 interacts with the FACT component Spt16 (Foltman et  
187 al., 2013): furthermore, Pol  $\alpha$  contains a histone-binding motif for H2A and H2B and it is  
188 implicated in the maintenance of repressive chromatin during replication (Evrin et al., 2018). The  
189 change in the distribution of Okazaki fragment ends at moderate Pol  $\alpha$  levels that do not affect  
190 lagging-strand priming (cf. Fig. 1D&G) supports an intimate role for Pol  $\alpha$  in chromatin assembly  
191 on the lagging strand.

192  
193 **Reduced levels of Pol  $\alpha$  lead to a global decrease in replication origin firing efficiency**

194  
195 Replication origin firing efficiency can be quantitatively inferred from the distribution of Watson-  
196 and Crick-strand Okazaki fragments after deep sequencing (McGuffee et al., 2013; Petryk et al.,

197 2016; Pourkarimi et al., 2016). By comparing the fraction of Okazaki fragments mapping to the  
198 Watson and Crick strands in the region  $\pm 10$  kb from the replication origin midpoint, an Origin  
199 Efficiency Metric (OEM) can be calculated (McGuffee et al., 2013). Okazaki fragment  
200 distributions across a  $\sim 400$  kb region of chromosome 4 containing both early and late firing  
201 regions are shown in Fig. 2A. Genome-wide origin efficiencies are quantified as OEM in Fig. 2B.  
202 OEMs for each origin at all conditions are compiled in Table S1. Comparisons between replicate  
203 datasets were robust across galactose concentrations (Fig. S2A), and each Pol  $\alpha$  concentration  
204 maintains a consistent trend across replicates (Fig. S2B). Data in Fig. 2 represent the mean  
205 origin efficiency across three replicate experiments. In wild-type cells, origin efficiency was  
206 unaffected across the full range of galactose concentrations tested (Fig. 2B). In the *GDPOL1*  
207 strain, origin firing was maintained at wild-type levels above a critically low level of Pol  $\alpha$   
208 (0.023% galactose). A significant reduction in average origin firing efficiency was observed at  
209 0.023% galactose, and firing efficiency was maintained at this decreased level at progressively  
210 lower galactose concentrations (Fig. 2B). These changes in average origin firing efficiency are  
211 also shown in Fig. 2C as a change in the proportion of Okazaki fragments mapping to the  
212 Watson strand around a meta-origin.

213  
214 Interestingly, we observed that the efficiency of productive replication origin firing is impaired at  
215 a similar Pol1 concentration (0.023% galactose) to the concentration at which Okazaki fragment  
216 length is increased (0.014% galactose) (Fig 1D&E). This decrease in origin efficiency likely  
217 contributes to the slow growth (Fig. S3A), cell-cycle delay (Fig. S3B & (Lemoine et al., 2005)),  
218 and accumulation of S-phase cells (Fig. S3C) observed under limiting Pol1 conditions. However,  
219 since growth is slower at 0.005% than 0.014% while origin efficiency is unchanged, reduced  
220 origin firing cannot be the only cause of the slow growth. To test whether replisome stalling or

221 arrest at hard-to-replicate sites was increased under low Pol1 conditions, we analyzed  
222 replication direction around 93 tRNA genes (Fig. S4) as previously described (Osmundson et  
223 al., 2017). tRNA genes are the major sites of replisome stalling in the *S. cerevisiae* genome  
224 (Ivessa et al., 2003; Osmundson et al., 2017), and changes in Okazaki fragment polarity can  
225 robustly detect increased or decreased fork stalling at these sites (Osmundson et al., 2017). We  
226 did not observe fork stalling at any galactose concentration (Fig. S4). Thus, we conclude that  
227 replication-fork stalling or arrest is not substantially affected by limiting Pol  $\alpha$  concentrations.

228

229 If one or more Pol  $\alpha$  complexes is stably recruited to and maintained in the replisome upon  
230 leading-strand initiation, reducing Pol  $\alpha$  to sub-stoichiometric levels would privilege early and/or  
231 efficient replication origins while disproportionately reducing the efficiency of late and/or  
232 inefficient origins. By contrast, distributive recruitment would lead to reduced efficiency of all  
233 origins under limiting Pol  $\alpha$  conditions. We analyzed origin efficiency in the *GDPOL1* strain as a  
234 function of normal firing efficiency. As the concentration of Pol  $\alpha$  was decreased below the  
235 threshold, firing of essentially all origins became less efficient regardless of their normal  
236 efficiency (Fig. 2D & S2C). Both early- and late-firing replication origins showed a global  
237 decrease in firing efficiency at low Pol1 concentrations (Fig. 2E). Similarly, origins whose firing  
238 is stimulated or unaffected by forkhead-mediated spatial clustering (Knott et al., 2012) were all  
239 affected by Pol  $\alpha$  depletion (Fig. 2F). The firing efficiency of origins repressed by forkhead  
240 transcription factors was not significantly impacted by Pol  $\alpha$  depletion (Fig. 2F), likely because  
241 these origins fire inefficiently under normal conditions.

242

243 To confirm the global decrease in origin firing efficiency at limiting Pol  $\alpha$  levels, we analyzed  
244 DNA copy number via whole genome sequencing (WGS) of cells collected in S-phase following

245 release from G1 arrest at a range of galactose concentrations (Fig. 3A). We sequenced  
246 samples from early, mid, and late S-phase cells based on flow cytometry grown at 0.05%,  
247 0.014% and 0.005% galactose (Fig. S3D), and combined these data to obtain a snapshot of the  
248 population across the whole of S-phase.

249  
250 The read depth across chromosome 4 from our pan-S-phase samples, normalized to a G1  
251 sample, is shown in Fig. 3B. The global reduction in origin firing efficiency inferred from Okazaki  
252 fragment sequencing (Fig. 2A-D) would be expected to ‘flatten’ the distribution of read depths in  
253 S-phase such that early-replicating regions are less overrepresented and late-replicating  
254 regions are correspondingly less underrepresented. Our data are broadly consistent with this  
255 prediction (cf. labeled early- and late-replicating regions in Fig. 3B). However, a small number of  
256 early-firing origins do not follow the expected trend, and are present at higher copy number  
257 under limiting Pol  $\alpha$  conditions (Fig. 3B). The three such origins on chromosome 4 are among  
258 the earliest replicating sites in the genome (Raghuraman et al., 2001), and we reasoned that the  
259 increased peak heights at these origins under limiting Pol  $\alpha$  conditions might represent a  
260 population of cells stuck in early S-phase, corresponding to a persistent peak offset from G1  
261 observed at 0.014% and 0.005% galactose in our flow cytometry data (Fig. S3D). To test this  
262 hypothesis, we compared DNA abundance around replication origins across our samples.  
263 While the overall abundance of genomic DNA around all replication origins was similar for  
264 0.05%, 0.014% and 0.005% galactose (Fig. 3B), the earliest 22 origins with  $T_{rep}$  under 18  
265 minutes (Raghuraman et al., 2001) showed increased signal at low galactose while the  
266 remaining 261 origins showed slightly decreased enrichment (Fig. 3C). Thus, for cells  
267 progressing through S-phase, our copy-number data support a global reduction in origin  
268 efficiency. Moreover, the observation that early-replicating regions are more highly sequenced

269 than late-replicating regions across all galactose concentrations suggests that relative origin  
270 timing is unaffected by Pol  $\alpha$  concentration.

271

272 **Ctf4 stimulates Pol  $\alpha$  recruitment for Okazaki fragment initiation at moderate Pol  $\alpha$  levels,**  
273 **and is required for efficient origin firing during severe Pol  $\alpha$  depletion.**

274

275 Ctf4 has previously been shown to stimulate the recruitment or maintenance of Pol  $\alpha$  and  
276 several additional proteins to the replisome (Gambus et al., 2009; Samora et al., 2016; Tanaka et  
277 al., 2009; Villa et al., 2016). Indeed, it has been proposed that a Ctf4 homotrimer could  
278 simultaneously recruit two Pol  $\alpha$  complexes while the third subunit is tethered to the replisome  
279 via interaction with the Sld5 component of the Cdc45/MCM2-7/GINS (CMG) complex (Simon et  
280 al., 2014). *CTF4* is nonessential in *S. cerevisiae*; the absence of Ctf4 does not affect lagging-  
281 strand synthesis in a reconstituted *S. cerevisiae* replication system (Kurat et al., 2017), and  
282 Okazaki fragment length is unchanged in otherwise wild-type *ctf4* $\Delta$  cells (Borges et al., 2013).  
283 Pol1 contains a Ctf4 interacting peptide (CIP) motif that is necessary for Ctf4 to recruit Pol  $\alpha$  to  
284 the fork: mutating specific residues in the CIP abolishes the interaction between Pol1 and Ctf4  
285 without affecting the recruitment of other proteins to the fork (Simon et al., 2014, Villa et al.,  
286 2016). To investigate the effect of Ctf4 on leading- and lagging-strand synthesis under limiting  
287 Pol  $\alpha$  conditions, we abrogated the Pol  $\alpha$ -Ctf4 interaction via deletion of *CTF4* or mutation of the  
288 Pol1 CIP box (*pol1-4A*) (Simon et al., 2014). We analyzed Okazaki fragments from these strains  
289 using, end labeling, Southern blots, and sequencing.

290

291 In the absence of Ctf4, Okazaki fragments increase in length at ~0.06% galactose (Fig. 4A,)–  
292 significantly higher than the 0.014% observed for a *CTF4* wild-type strain (cf. Fig. 1D&E). The

293 *GDpol1-4A* strain showed a similar increase in Okazaki fragment length to the *ctf4Δ* strain, with  
294 longer fragments observed at 0.05% galactose (Fig. 3B&C, replicate experiments in Fig.  
295 S5A&C). These longer Okazaki fragments at sub-endogenous Pol1 levels (0.05%) were further  
296 confirmed by Southern blot with a whole genome probe (Fig. S5B). Continued growth while  
297 synthesizing long Okazaki fragments was observed down to 0.005% galactose (Fig. 4B&C). It  
298 has previously been demonstrated that overall cellular levels of Pol1 are unaffected by the  
299 absence of, or a failure to bind, Ctf4 (Villa et al., 2016). Our data therefore suggest that Ctf4  
300 helps to maintain robust lagging-strand priming when Pol  $\alpha$  activity is reduced, although cellular  
301 levels of Pol  $\alpha$  are sufficient for normal Okazaki fragment initiation even in its absence (Fig. 4A  
302 and (Borges et al., 2013)).

303

304 We analyzed replication origin firing efficiency in the absence of Ctf4-Pol  $\alpha$  interactions by  
305 sequencing Okazaki fragments from *ctf4Δ;GDPOL1* and *GDpol1-4A* strains grown at various  
306 galactose concentrations (Fig. 4C). Data shown are the average of two replicates. Correlations  
307 between replicates were extremely robust at all concentrations of Pol  $\alpha$  (Fig. S6A&B). In the  
308 absence of Ctf4, cells maintained normal levels of origin firing down to 0.032% galactose (Fig.  
309 4D). The *GDpol1-4A* strain showed normal origin efficiency down to 0.023% galactose (Fig. 4E).  
310 Neither Fkh status (Knott et al., 2012) nor firing time (Raghuraman et al., 2001) modulates the  
311 impact of Ctf4 on origin efficiency (Fig. S7A-C). Notably, in both *ctf4Δ;GDPOL1* and *GDpol1-4A*  
312 strains, further reduction in Pol1 levels below the initial threshold for decreased origin efficiency  
313 led to progressively lower origin firing (Fig. 4D&E). This additional decrease in origin efficiency  
314 was not observed in the *GDPOL1* strain with wild-type *CTF4* (Fig. 2B). Therefore, while the  
315 absence of Ctf4 does not appear to impact origin firing at moderate levels of Pol  $\alpha$ , the Ctf4-Pol1  
316 interaction appears to maintain relatively robust origin firing when Pol  $\alpha$  is severely depleted. We

317 conclude that Ctf4-mediated recruitment of Pol  $\alpha$  to the replisome does not stimulate replication-  
318 origin firing in *S. cerevisiae* unless Pol  $\alpha$  is severely limiting, but plays an important role in  
319 maintaining the robustness of lagging-strand priming to fluctuations in the availability of Pol  $\alpha$ .  
320  
321 Each rDNA repeat in *S. cerevisiae* contains a replication origin. rDNA size has been reported to  
322 change due to deletion of *CTF4* (Sasaki and Kobayashi, 2017) or lithium acetate transformation  
323 (Kwan et al., 2016). Expansion of the rDNA repeat increases the total number of origins in the  
324 genome, and could thereby depress origin firing elsewhere (Shyian et al., 2016; Yoshida et al.,  
325 2014). We investigated whether the origin efficiency in *ctf4* $\Delta$  cells is impacted by the size of the  
326 rDNA array. The proportion of Okazaki fragments mapping to the rDNA in *ctf4* $\Delta$  libraries was  
327 around 70% higher than in *CTF4* or *pol1-4A* libraries (Fig. S5E), consistent with substantial  
328 array expansion in the absence of Ctf4 (Sasaki and Kobayashi, 2017). However, this change in  
329 rDNA copy number appears to have a minimal effect on genome-wide origin firing efficiency.  
330  
331 To address the possibility that chromatin assembly defects may be the major cause of longer  
332 Okazaki fragments upon Pol  $\alpha$  depletion, we analyzed the distribution of Okazaki fragment  
333 termini around nucleosome dyads at 0.05% galactose – a concentration that generates longer  
334 Okazaki fragments only in the context of the *ctf4* $\Delta$ ;*GDPOL1* and *GDpol1-4A* strains (Fig. 3A-C)  
335 but not the wild-type strain (Fig. 1C). At this intermediate Pol  $\alpha$  concentration, the distribution of  
336 Okazaki fragment 5' and 3' termini was highly nucleosome-biased and very similar between  
337 wild-type, *GDPOL1*, *ctf4* $\Delta$ ;*GDPOL1*, and *GDpol1-4A* strains (Fig. 3F & S5F-G). At low Pol  $\alpha$   
338 concentrations, the distribution of Okazaki fragment 5' and 3' termini lost nucleosome patterning  
339 in *ctf4* $\Delta$ ;*GDPOL1*, and *GDpol1-4A* (Fig. S5F-G), similarly to the behavior of the wild-type  
340 *GDPOL1* strain (Fig. 1G). However, the alignment of Okazaki fragment 5' or 3' end locations  
341 with nucleosome dyads was lost at higher Pol  $\alpha$  concentrations in *ctf4* $\Delta$ ;*GDPOL1* strains

342 compared to *GDpol1-4A* (Fig. S5F-G), consistent with an additional contribution of Ctf4 to  
343 chromatin assembly beyond Pol  $\alpha$  recruitment.  
344  
345 *ctf4 $\Delta$ ;GDPOL1*, and *GDpol1-4A* cells grown at 0.05% galactose show increased Okazaki  
346 fragment length (Fig. 4B-C) but no defect in the nucleosome patterning of Okazaki fragment  
347 termini (Fig. 4F). Therefore, Okazaki fragment length can be increased by reduced Okazaki  
348 fragment initiation in the absence of an accompanying chromatin assembly defect. We note that  
349 these data are not inconsistent with impaired nucleosome assembly at severely reduced Pol  $\alpha$   
350 concentrations contributing to a further increase in Okazaki fragment length.

351

352 **Checkpoint activation is required for viability when origin firing is reduced, but not when**  
353 **lagging-strand priming is perturbed**

354

355 In response to DNA damage or replication stress, a checkpoint signaling cascade is initiated  
356 and culminates in the phosphorylation of the effector kinase Rad53 (Ciccia and Elledge, 2010).  
357 We analyzed Rad53 phosphorylation in the *GDPOL1* strain after a switch to low galactose.  
358 Substantial phosphorylation of Rad53 was observed only at concentrations below 0.023%  
359 galactose (Fig. 5A) – a concentration at which both origin firing and Okazaki fragment initiation  
360 are perturbed (Figs. 1&2). To further investigate the interplay between Pol  $\alpha$  depletion,  
361 increased Okazaki fragment length, decreased origin firing, and checkpoint activation, we  
362 combined the *GDPOL1* allele with deletion of *MEC1* (with additional deletion of *SML1* to  
363 maintain viability of *mec1 $\Delta$*  cells). Growth of the *GDPOL1; mec1 $\Delta$ ; sml1 $\Delta$*  mutant was impaired  
364 at 0.05% galactose and virtually absent at 0.014% and 0.005% galactose (Fig. 5B). Thus,  
365 checkpoint-deficient cells cannot survive with limiting Pol  $\alpha$ . Consistent with a rapid loss of  
366 viability upon Pol1 depletion in checkpoint-deficient cells, we were unable to robustly detect long



367 Okazaki fragments in *GDPOL1; mec1Δ; sml1Δ* cells shifted to low concentrations of galactose  
368 (Fig. 5C). Okazaki fragment length was normal in this strain at galactose concentrations above  
369 0.023%.

370

371 To test the contributions of the DNA damage checkpoint (DDC), mediated by Rad9, and the  
372 DNA replication checkpoint (DRC), mediated by Mrc1, to survival under limiting Pol  $\alpha$   
373 conditions, we analyzed the growth of *GDPOL1* strains in combination with *rad9Δ*, *mrc1Δ*, or  
374 the non-phosphorylatable *mrc1<sup>AQ</sup>* allele (Osborn and Elledge, 2003) (Fig. 5B&D; the full range of  
375 galactose concentrations is shown in Fig. S8A-B). *GDPOL1* cells showed robust growth at low  
376 Pol1 concentrations (0.014% galactose) in both *rad9Δ* and *mrc1Δ* strain backgrounds.

377 *GDPOL1;mrc1<sup>AQ</sup>; rad9Δ* cells did not grow at 0.005% galactose (Fig. 5D), confirming that the  
378 inviability of *GDPOL1; mec1Δ; sml1Δ* cells under these conditions is due to the absence of  
379 functional DDC and DRC signaling. We note that *GDPOL1;mrc1<sup>AQ</sup>* cells grow better than  
380 *GDPOL1;mrc1Δ* cells at all concentrations tested; this suggests that the slight growth defect at  
381 0.005% galactose observed in *GDPOL1;mrc1Δ* cells is most likely due to decreased replication  
382 fork speed (Szyjka et al., 2005; Yeeles et al., 2017) in combination with decreased origin firing  
383 (Fig. 2B) as opposed to impaired DRC activity. In summary, checkpoint activation is required for  
384 viability under conditions of severe Pol  $\alpha$  depletion: this activation can proceed via either the  
385 DDC or the DRC.

386

387 We investigated the sensitivity of *GDPOL1* cells during Pol  $\alpha$  depletion to either replication  
388 stress or DNA damage by testing growth defects in the presence of 1 mM hydroxyurea or  
389 0.008% methyl methanesulfonate (Fig. S8A-D). We observed that growth defects in the  
390 presence of HU or MMS were exacerbated by lowering the concentration of Pol  $\alpha$ ; this effect  
391 was apparent in both checkpoint-proficient and checkpoint-deficient strains. Indeed, in the

392 presence of 1 mM HU a significant growth defect can be observed at 0.05% galactose – a  
393 concentration at which neither origin firing nor lagging-strand priming is impaired in strains  
394 proficient for Ctf4-Pol  $\alpha$  interaction.

395  
396 To determine whether the requirement for checkpoint activation was due to deregulated lagging-  
397 strand priming or impaired leading-strand initiation, we compared the growth of  
398 *GDPOL1;mec1 $\Delta$ ;sml1 $\Delta$*  strains with and without *CTF4* or *pol1-4A* at 0.5% and 0.05% galactose.  
399 Loss of Ctf4-Pol  $\alpha$  interactions affects Okazaki fragment initiation at relatively high Pol  $\alpha$   
400 concentrations, before leading-strand initiation is impaired. Thus, *ctf4 $\Delta$*  and *pol1-4A* are  
401 effectively separation of function mutants: at 0.05% galactose, Okazaki fragment initiation is  
402 reduced by the absence of Ctf4-mediated recruitment of Pol  $\alpha$  while leading-strand initiation is  
403 not (Fig. 4). *GDPOL1;mec1 $\Delta$ ;sml1 $\Delta$ ;ctf4 $\Delta$*  cells grow slowly relative to *MEC1* or *CTF4* cells:  
404 however, growth was minimally affected by galactose concentrations (Fig. 5E). This result is  
405 recapitulated with *GDpol1-4A;mec1 $\Delta$ ;sml1 $\Delta$*  strain, which showed essentially no growth defect  
406 at either Pol  $\alpha$  concentration (Fig. 5E). Therefore, perturbed lagging-strand synthesis does not  
407 directly cause growth defects the absence of a functional checkpoint. We conclude that cells  
408 with limiting Pol  $\alpha$  become reliant on the checkpoint at least in part due to decreased replication  
409 origin firing as opposed to solely due to increased Okazaki fragment length.

410

## 411 **Discussion**

412

### 413 **Cellular impact of perturbed leading- and lagging-strand initiation.**

414

415 Checkpoint activation is required for robust DNA synthesis, and therefore for viability, when  
416 origin firing is significantly reduced (Fig. 5). This observation is consistent with genetic

417 interactions in *S. cerevisiae* – for example similar negative genetic interactions of *rad9Δ* with  
418 alleles of the catalytic subunits of each of the three replicative polymerases (Dubarry et al.,  
419 2015). It will be interesting to determine the contributions of leading- and lagging-strand  
420 perturbations to the many reported phenotypes resulting from *pol1* mutation or Pol1 depletion –  
421 for example increased trinucleotide repeat expansion rate and size (Shah et al., 2012), and  
422 increased chromosome fragility (Lemoine et al., 2005; Song et al., 2014). Furthermore,  
423 mutations that reduce the levels of functional Pol  $\alpha$  (Van Esch et al., 2019) or Pol  $\epsilon$  (Bellelli et al.,  
424 2018) in mammalian cells increase replication stress linked to reduced origin firing, highlighting  
425 the relevance of these studies beyond budding yeast.

426

#### 427 **Pol $\alpha$ initiation on the leading and lagging strands**

428

429 Our data indicate that both origin firing and Okazaki fragment initiation in *S. cerevisiae* are  
430 robust with respect to fluctuations in Pol  $\alpha$  availability. Pol  $\alpha$  concentration does not normally  
431 limit primer synthesis and/or utilization, and significant disruption of Okazaki fragment synthesis  
432 or replication initiation is only observed at very low Pol  $\alpha$  concentrations (Fig. 1). Because cells  
433 with limiting Pol  $\alpha$  synthesize longer Okazaki fragments, as opposed to fewer Okazaki  
434 fragments of normal size, our data suggest that Pol  $\alpha$  can function distributively *in vivo* as  
435 opposed to being obligately tethered at the replication fork. We additionally note that the  
436 increase in Okazaki fragment length upon Pol  $\alpha$  depletion is consistent with a priming  
437 mechanism in which there is no strict coupling between DNA unwinding and primer synthesis *in*  
438 *vivo* (Fig. 6A).

439

440 Although the Ctf4 protein has little to no effect on lagging-strand synthesis in chromatinized  
441 reconstituted systems (Kurat et al., 2017), we observe that Ctf4 stimulates lagging-strand  
442 priming *in vivo*. In the absence of Ctf4, Okazaki fragment length can still be modulated by Pol  $\alpha$   
443 concentration (Fig. 4). Thus, in light of the potentially distributive action of Pol  $\alpha$ , we propose a  
444 simple model that Ctf4 acts by increasing the local concentration of Pol  $\alpha$  at the elongating  
445 replication fork. An alternative possibility is that Ctf4 maintains two copies of Pol  $\alpha$  at each  
446 replisome under normal conditions (Fig. 6B). It is unclear what underlies the differential Ctf4-  
447 sensitivity of reconstituted and *in vivo* lagging-strand synthesis. Our data also show that, unlike  
448 ongoing Okazaki fragment priming during lagging-strand synthesis, the productive initiation of  
449 DNA synthesis at replication origins is not impacted by the absence of Ctf4-mediated  
450 recruitment until severely limiting Pol  $\alpha$  concentrations (Figs. 2&4). A recent report  
451 demonstrated that leading-strand initiation can occur via extension of the first Okazaki fragment  
452 from the opposite replication fork, and that the two replisomes are inter-dependent during this  
453 establishment phase (Aria and Yeeles, 2018). The close proximity of the two replisomes at this  
454 stage could underlie the differential Ctf4-sensitivity of replication-origin firing at moderate and  
455 low Pol  $\alpha$  concentrations.

456  
457 All replication origins are affected by Pol  $\alpha$  depletion, without dependence on their normal firing  
458 time or efficiency (Fig. 2E & 3B). Therefore, it is unlikely that the reduction in origin firing is a  
459 direct result of checkpoint activation. Our data suggest that the origin firing program is  
460 determined by the relative accessibility of licensed origins to limiting soluble firing factors, even  
461 when overall origin firing is reduced. We note that coordinately down-regulating the efficiency of  
462 all origins, as opposed to selectively reducing the efficiency of a subset, represents a robust  
463 strategy to maintain the evolutionarily selected co-orientation of deleterious transcription events

464 with replication (Chen et al., 2019; Hamperl et al., 2017; Osmundson et al., 2017; Tran et al.,  
465 2017).

466

### 467 **Chromatin and lagging-strand synthesis**

468

469 Pol  $\alpha$  acts distributively on naked DNA in reconstituted replication reactions (Yeeles et al., 2017).

470 Chromatin reduces Okazaki fragment size *in vitro*, and has therefore been proposed to make

471 Pol  $\alpha$  more processive (Kurat et al., 2017). Our data suggest that Pol  $\alpha$  can act distributively on

472 chromatin *in vivo*, but is present at saturating concentrations that would minimize the difference

473 between distributive or processive activity. Our data do, however, support an intimate interaction

474 between chromatin and lagging-strand priming. Extreme depletion of Pol  $\alpha$  leads to Okazaki

475 fragment distributions consistent with impaired chromatin assembly (Fig. 1G and S5F-G). Since

476 Ctf4 connects Pol  $\alpha$  to the replicative helicase, its absence also impacts chromatin dynamics

477 during DNA replication (Evrin et al., 2018). However, perturbed Okazaki fragment initiation in the

478 absence of Ctf4-mediated recruitment of Pol  $\alpha$  to the fork can generate longer Okazaki

479 fragments in the absence of an obvious chromatin assembly defect (Fig. 4F). It is also possible

480 that the increased length of Okazaki fragments reported in histone chaperone mutants (Smith

481 and Whitehouse, 2012; Yadav and Whitehouse, 2016) represents an underlying defect in

482 priming.

483

484

485

## 486 **MATERIALS AND METHODS**

### 487 **Yeast strains**

488 All yeast strains were W303 *RAD5+*, and contained additional mutations required for anchor-  
489 away depletion of Cdc9. The genotype of the wild-type strain is *mata, tor1-1::HIS3,*  
490 *fpr1::NatMX4, RPL13A-2xFKBP12::TRP1, CDC9-FRB::HygMX*. The *pol1-4A* mutant from  
491 (Simon et al., 2014) was generated using the CRISPR/Cas9 system in *S. cerevisiae* as  
492 previously described (Dicarlo et al., 2013). Briefly, a guide RNA was synthesized specific to the  
493 CIP box in *POL1* that could not be cleaved if repaired with donor sequence with D141A, D142A,  
494 L144A and F147A mutations and 100 bp of homology on both sides. This created a markerless  
495 strain that was confirmed through Sanger sequencing. After transformations, strains were grown  
496 on YPD to lose the Cas9 and gRNA plasmids. Additional gene deletions, and replacement of  
497 the *POL1* promoter, were carried out by PCR-mediated replacement in a wild-type strain, and  
498 introduced into the desired background by cross.

499

### 500 **Cell growth, cell-cycle synchronization, and spot tests**

501 All strains were grown at 30°C, starting in YEP with 0.5% galactose plus 3% raffinose, unless  
502 otherwise noted. To deplete Pol1 levels, cultures were sugar switched by growing overnight to  
503 log phase then washing the cells with sterile deionized water then sterile YEP before being  
504 inoculated into fresh YEP media with various galactose concentrations supplemented with 3%  
505 raffinose.

506

507 For short-term experiments, strains were grown for four hours after the sugar switch before  
508 adding rapamycin for one hour of ligase repression. Cells were collected four hours after the  
509 sugar switch for western blot analysis.

510 For cell-cycle synchronization, cultures were sugar-switched at log phase and then added  
511 5g/mL alpha factor to synchronize cells in G1 phase. Cells were released into S phase and were  
512 collected every 15 minutes by centrifugation at 4°C then stored at -80°C or by immediately fixing  
513 cells in 70% ethanol.

514 For spot tests, yeast cells were washed then counted. Similar numbers of cells were plated onto  
515 various galactose concentrations with or without 1mM hydroxyurea (Sigma H8627) or 0.008%  
516 methyl methanesulfonate (Sigma 129925) at a 1:5 dilution series and grown overnight for two  
517 days at 30°C unless indicated otherwise.

#### 518 519 **Fluorescence-activated cell sorter (FACS) analysis**

520 Cells were collected after release from G1 arrest every 15 minutes and fixed in 70% ethanol and  
521 incubated at 4°C overnight. Fixed cells were then spun down and resuspended in 50mM sodium  
522 citrate with RNase A (Fisher 50-153-8126) for 1 hour at 50°C. Next, with the addition of  
523 proteinase K (MP Biomedicals) the samples were incubated for 1 hour at 50°C. Cells were then  
524 stained with SYTOX green (Fisher S7020) then sonicated and processed using a Becton  
525 Dickinson Accuri.

#### 526 527 **Western blotting**

528 Samples were collected by centrifugation and washed with deionized water and stored at -80°C  
529 before lysate preparation. Lysates were prepared by five-minute resuspension in 600uL 2M  
530 lithium acetate on ice, pelleted, resuspended in 600uL 400mM sodium hydroxide at room  
531 temperature for five minutes, pelleted, and resuspended in Laemmli buffer with 5% beta-  
532 mercaptoethanol prior to boiling, then briefly pelleted immediately prior to loading the lysate onto  
533 a SDS-PAGE gel. Samples were transferred to PVDF, blocked with 5% milk and probed with C-  
534 Myc antibody (Genscript A00173-100), Rad53 antibody (Abcam ab104232), histone H4  
535 antibody (Abcam ab10158), or actin antibody (Thermofisher Scientific MA1-744).

536

537 **Okazaki fragment analysis by gel electrophoresis**

538 Following the sugar switch methods above, Okazaki fragments were accumulated by adding  
539 rapamycin (Spectrum 41810000-2) to 1ug/mL to anchor away Cdc9, which is tagging with FRB,  
540 for 1h (Haruki et al., 2008). These cells were collected through centrifugation and immediately  
541 processed or stored at -80°C. Genomic preps from spheroplasts were completed as previously  
542 described (Smith and Whitehouse, 2012). For end-labeling, 5uL of genomic DNA was labeled  
543 using a 50uL reaction with 5U Klenow exo- (NEB M0212L) and  $\alpha$ -dCTP (Perkin Elmer  
544 BLU513H500UC) at a final concentration of 33 nM. Reactions were then ethanol precipitated to  
545 remove excess label. Normalized amounts (from either native gel or previous experiment) were  
546 loaded onto a 1.3% denaturing agarose gel. After electrophoresis, gels were then blotted onto  
547 nitrocellulose membrane (Fisher 45-000-932) overnight. Membranes were then dried and  
548 exposed to phosphor screens.

549 For southern blot analysis, unlabeled genomic DNA was normalized to total genomic DNA, and  
550 run on 1.3% denaturing agarose gels. After electrophoresis, the gel was blotted onto a  
551 nitrocellulose membrane (Fisher 45-000-932) overnight. Next the membrane was crosslinked  
552 and washed, then hybridized overnight with a probe synthesized with random hexamers labeling  
553 kit (Fisher 18187-013) and sheared genomic DNA. After two low stringency washes,  
554 membranes were dried then exposed to phosphor screens.

555

556 **Okazaki fragment purification, sequencing, and analysis**

557 Genomic DNA was boiled at 95°C for 5 min then salt was added to 300mM NaCl, pH 12.  
558 Purification of Okazaki fragments was accomplished by running the denatured genomic DNA  
559 through 400 ul Source 15Q (VWR 89128-854), binding at 300 mM NaCl, pH 12. DNA was



560 eluted in 50mM steps until 900mM NaCl, pH 12, fractions kept were 800mM, 850mM, and  
561 900mM, these were stored at -20°C. DNA was ethanol precipitated then treated with RNase  
562 cocktail (Thermo Fisher AM2286) for 1h at 37°C to remove any RNA. Next, these reactions  
563 were ethanol precipitated then run through Illustra microspin G-50 columns (Fisher 27-5330-02).  
564 The single-strand Okazaki fragments were boiled at 95°C for 5 min and cooled quickly on ice  
565 and up to 1ug of purified fragments were ligated with T4 DNA ligase (Fisher 50305904) to 1ug  
566 of adaptors with single-stranded overhangs that were generated as previously described (Smith  
567 and Whitehouse, 2012). Purified libraries were amplified (12-16 cycles) using Illumina Truseq  
568 primers according to Illumina protocols, but with Phusion (NEB M0530L). Paired-end  
569 sequencing (2 × 75 bp) was carried out on an Illumina Next-seq 500 platform. FASTQ files were  
570 aligned to the s288c reference genome using the Bowtie (v2.3.2). The files were converted,  
571 then bad quality reads and PCR duplicates were removed using the Samtools suite (v1.9). Then  
572 the genomic coverage was calculated using the Bedtools suite (v2.27.1) in a strand-specific  
573 manner to make stranded bed files. Origin efficiency metric analysis was achieved through  
574 calculating the strand bias in 10kb windows around predefined origins as previously described  
575 (McGuffee et al., 2013) with the origin list from the same source. To map the Okazaki fragments  
576 ends relative to known nucleosome dyads (Jiang and Pugh, 2009), 5' and 3' fragment ends were  
577 extracted from previously generated bed files and a meta-analysis was completed as previously  
578 described (Smith and Whitehouse, 2012).

579

## 580 **Whole genome sequencing and analysis**

581 Cells were incubated for 4h at various galactose concentrations with a simultaneous arrest with  
582 5mg/ml alpha factor for 3h. Cells were collected every ten minutes after a room temperature  
583 (25°C) release. Samples were collected and stored for flow cytometry at 4°C and for whole

584 genome sequencing at -80°C. Samples were selected for analysis based on flow cytometry  
585 data. All samples, including a G1 control, were lysed using a FastPrep system. The lysates  
586 were then sonicated using a Branson 250 sonicator at 15% for 15 seconds 5X. The sheared  
587 DNA was then treated with 100µg of Proteinase K for 2h at 37°C. Samples were then phenol  
588 chloroform extracted and precipitated. DNA was then quantified and libraries were prepped  
589 using TruSeq Nano DNA LT Kit (Illumina 20015964). Sequencing and alignment methods were  
590 performed as mentioned above, but sequencing was not strand-specific. Pertinent S phase  
591 samples were pooled for analysis. These genomic coverage files were normalized to the  
592 median coverage, binned to 100bps, and poorly mapped sites were removed from all datasets  
593 (Table S2). Next, the coverage was calculated by taking the read depth normalized to G1 and  
594 the smoothed using a Loess regression in R. To perform a meta-analysis around all or specific  
595 origins of replication, the average coverage around these origins were calculated using the  
596 same origin list as above.

597

598

## 599 **ACKNOWLEDGEMENTS**

600 We thank the NYU Gencore for assistance with TapeStation and sequencing, and members of  
601 the Smith lab for helpful discussions.

## 602 **REFERENCES**

- 603 Aria, V., and Yeeles, J. T. P. (2018). Mechanism of Bidirectional Leading-Strand Synthesis  
604 Establishment at Eukaryotic DNA Replication Origins. *Mol Cell*
- 605 Balakrishnan, L., and Bambara, R. A. (2013). Okazaki fragment metabolism. *Cold Spring Harb*  
606 *Perspect Biol* 5,; doi: 10.1101/cshperspect.a010173.
- 607 Bellelli, R., Borel, V., Logan, C., Svendsen, J., Cox, D. E., Nye, E., Metcalfe, K., O'Connell, S.  
608 M., Stamp, G., Flynn, H. R., Snijders, A. P., Lassailly, F., Jackson, A., and Boulton, S. J.  
609 (2018). Pole Instability Drives Replication Stress, Abnormal Development, and  
610 Tumorigenesis. *Mol Cell* <https://doi.org/10.1016/j.molcel.2018.04.008>,

- 611 Borges, V., Smith, D. J., Whitehouse, I., and Uhlmann, F. (2013). An Eco1-independent sister  
612 chromatid cohesion establishment pathway in *S. cerevisiae*. *Chromosoma* *122*, 121-134.
- 613 Chen, Y. H., Keegan, S., Kahli, M., Tonzi, P., Fenyő, D., Huang, T. T., and Smith, D. J. (2019).  
614 Transcription shapes DNA replication initiation and termination in human cells. *Nat Struct*  
615 *Mol Biol* *26*, 67-77.
- 616 Ciccio, A., and Elledge, S. J. (2010). The DNA damage response: making it safe to play with  
617 knives. *Mol Cell* *40*, 179-204.
- 618 Clausen, A. R., Lujan, S. A., Burkholder, A. B., Orebaugh, C. D., Williams, J. S., Clausen, M. F.,  
619 Malc, E. P., Mieczkowski, P. A., Fargo, D. C., Smith, D. J., and Kunkel, T. A. (2015).  
620 Tracking replication enzymology in vivo by genome-wide mapping of ribonucleotide  
621 incorporation. *Nat Struct Mol Biol* *22*, 185-191.
- 622 Daigaku, Y., Keszthelyi, A., Muller, C. A., Miyabe, I., Brooks, T., Retkute, R., Hubank, M.,  
623 Nieduszynski, C. A., and Carr, A. M. (2015). A global profile of replicative polymerase  
624 usage. *Nat Struct Mol Biol* *22*, 192-198.
- 625 Devbhandari, S., Jiang, J., Kumar, C., Whitehouse, I., and Remus, D. (2017). Chromatin  
626 Constrains the Initiation and Elongation of DNA Replication. *Mol Cell* *65*, 131-141.
- 627 Dicarolo, J. E., Norville, J. E., Mali, P., Rios, X., Aach, J., and Church, G. M. (2013). Genome  
628 engineering in *Saccharomyces cerevisiae* using CRISPR-Cas systems. *Nucleic Acids Res*
- 629 Dubarry, M., Lawless, C., Banks, A. P., Cockell, S., and Lydall, D. (2015). Genetic Networks  
630 Required to Coordinate Chromosome Replication by DNA Polymerases  $\alpha$ ,  $\delta$ , and  $\epsilon$  in  
631 *Saccharomyces cerevisiae*. *G3 (Bethesda)* *5*, 2187-2197.
- 632 Evrin, C., Maman, J. D., Diamante, A., Pellegrini, L., and Labib, K. (2018). Histone H2A-H2B  
633 binding by Pol  $\alpha$  in the eukaryotic replisome contributes to the maintenance of repressive  
634 chromatin. *EMBO J* *37*,
- 635 Foltman, M., Evrin, C., De Piccoli, G., Jones, R. C., Edmondson, R. D., Katou, Y., Nakato, R.,  
636 Shirahige, K., and Labib, K. (2013). Eukaryotic replisome components cooperate to  
637 process histones during chromosome replication. *Cell Rep* *3*, 892-904.
- 638 Fumasoni, M., Zwicky, K., Vanoli, F., Lopes, M., and Branzei, D. (2015). Error-Free DNA  
639 Damage Tolerance and Sister Chromatid Proximity during DNA Replication Rely on the  
640 Pol $\alpha$ /Primase/Ctf4 Complex. *Mol Cell* *57*, 812-823.
- 641 Gambus, A., van Deursen, F., Polychronopoulos, D., Foltman, M., Jones, R. C., Edmondson, R.  
642 D., Calzada, A., and Labib, K. (2009). A key role for Ctf4 in coupling the MCM2-7 helicase  
643 to DNA polymerase alpha within the eukaryotic replisome. *EMBO J* *28*, 2992-3004.
- 644 Garbacz, M. A., Lujan, S. A., Burkholder, A. B., Cox, P. B., Wu, Q., Zhou, Z. X., Haber, J. E.,  
645 and Kunkel, T. A. (2018). Evidence that DNA polymerase  $\delta$  contributes to initiating leading  
646 strand DNA replication in *Saccharomyces cerevisiae*. *Nat Commun* *9*, 858.
- 647 Glover, T. W., Berger, C., Coyle, J., and Echo, B. (1984). DNA polymerase alpha inhibition by  
648 aphidicolin induces gaps and breaks at common fragile sites in human chromosomes.  
649 *Hum Genet* *67*, 136-142.
- 650 Hamperl, S., Bocek, M. J., Saldivar, J. C., Swigut, T., and Cimprich, K. A. (2017). Transcription-  
651 Replication Conflict Orientation Modulates R-Loop Levels and Activates Distinct DNA  
652 Damage Responses. *Cell* *170*, 774-786.e19.

- 653 Hanna, J. S., Kroll, E. S., Lundblad, V., and Spencer, F. A. (2001). *Saccharomyces cerevisiae*  
654 CTF18 and CTF4 are required for sister chromatid cohesion. *Mol Cell Biol* *21*, 3144-3158.
- 655 Haruki, H., Nishikawa, J., and Laemmli, U. K. (2008). The anchor-away technique: rapid,  
656 conditional establishment of yeast mutant phenotypes. *Mol Cell* *31*, 925-932.
- 657 Ivessa, A. S., Lenzmeier, B. A., Bessler, J. B., Goudsouzian, L. K., Schnakenberg, S. L., and  
658 Zakian, V. A. (2003). The *Saccharomyces cerevisiae* helicase Rrm3p facilitates replication  
659 past nonhistone protein-DNA complexes. *Mol Cell* *12*, 1525-1536.
- 660 Jiang, C., and Pugh, B. F. (2009). A compiled and systematic reference map of nucleosome  
661 positions across the *Saccharomyces cerevisiae* genome. *Genome Biol* *10*, R109.
- 662 Knott, S. R., Peace, J. M., Ostrow, A. Z., Gan, Y., Rex, A. E., Viggiani, C. J., Tavaré, S., and  
663 Aparicio, O. M. (2012). Forkhead Transcription Factors Establish Origin Timing and Long-  
664 Range Clustering in *S. cerevisiae*. *Cell* *148*, 99-111.
- 665 Kouprina, N., Kroll, E., Bannikov, V., Bliskovsky, V., Gizatullin, R., Kirillov, A., Shestopalov, B.,  
666 Zakharyev, V., Hieter, P., and Spencer, F. (1992). CTF4 (CHL15) mutants exhibit  
667 defective DNA metabolism in the yeast *Saccharomyces cerevisiae*. *Mol Cell Biol* *12*, 5736-  
668 5747.
- 669 Kunkel, T. A. (2011). Balancing eukaryotic replication asymmetry with replication fidelity. *Curr*  
670 *Opin Chem Biol* *15*, 620-626.
- 671 Kunkel, T. A., and Burgers, P. M. (2008). Dividing the workload at a eukaryotic replication fork.  
672 *Trends Cell Biol* *18*, 521-527.
- 673 Kurat, C. F., Yeeles, J. T., Patel, H., Early, A., and Diffley, J. F. (2017). Chromatin Controls DNA  
674 Replication Origin Selection, Lagging-Strand Synthesis, and Replication Fork Rates. *Mol*  
675 *Cell* *65*, 117-130.
- 676 Kwan, E. X., Wang, X. S., Amemiya, H. M., Brewer, B. J., and Raghuraman, M. K. (2016). rDNA  
677 Copy Number Variants Are Frequent Passenger Mutations in *Saccharomyces cerevisiae*  
678 Deletion Collections and de Novo Transformants. *G3 (Bethesda)* *6*, 2829-2838.
- 679 Lemoine, F. J., Degtyareva, N. P., Lobachev, K., and Petes, T. D. (2005). Chromosomal  
680 translocations in yeast induced by low levels of DNA polymerase  $\alpha$  a model for chromosome  
681 fragile sites. *Cell* *120*, 587-598.
- 682 McGuffee, S. R., Smith, D. J., and Whitehouse, I. (2013). Quantitative, Genome-Wide Analysis  
683 of Eukaryotic Replication Initiation and Termination. *Mol Cell* *50*, 123-135.
- 684 Miyabe, I., Mizuno, K., Keszthelyi, A., Daigaku, Y., Skouteri, M., Mohebi, S., Kunkel, T. A.,  
685 Murray, J. M., and Carr, A. M. (2015). Polymerase  $\delta$  replicates both strands after  
686 homologous recombination-dependent fork restart. *Nat Struct Mol Biol* *22*, 932-938.
- 687 Muzi Falconi, M., Piseri, A., Ferrari, M., Lucchini, G., Plevani, P., and Foiani, M. (1993). De novo  
688 synthesis of budding yeast DNA polymerase  $\alpha$  and POL1 transcription at the G1/S  
689 boundary are not required for entrance into S phase. *Proc Natl Acad Sci U S A* *90*, 10519-  
690 10523.
- 691 Ogawa, T., and Okazaki, T. (1980). Discontinuous DNA replication. *Annu Rev Biochem* *49*, 421-  
692 457.

- 693 Osborn, A. J., and Elledge, S. J. (2003). Mrc1 is a replication fork component whose  
694 phosphorylation in response to DNA replication stress activates Rad53. *Genes Dev* *17*,  
695 1755-1767.
- 696 Osmundson, J. S., Kumar, J., Yeung, R., and Smith, D. J. (2017). Pif1-family helicases  
697 cooperatively suppress widespread replication-fork arrest at tRNA genes. *Nat Struct Mol*  
698 *Biol* *24*, 162-170.
- 699 Petryk, N., Kahli, M., d'Aubenton-Carafa, Y., Jaszczyszyn, Y., Shen, Y., Silvain, M., Thermes,  
700 C., Chen, C. L., and Hyrien, O. (2016). Replication landscape of the human genome. *Nat*  
701 *Commun* *7*, 10208.
- 702 Pourkarimi, E., Bellush, J. M., and Whitehouse, I. (2016). Spatiotemporal coupling and  
703 decoupling of gene transcription with DNA replication origins during embryogenesis in *C.*  
704 *elegans*. *Elife* *5*,
- 705 Pursell, Z. F., Isoz, I., Lundstrom, E. B., Johansson, E., and Kunkel, T. A. (2007). Yeast DNA  
706 polymerase epsilon participates in leading-strand DNA replication. *Science* *317*, 127-130.
- 707 Raghuraman, M. K., E. A. Winzeler, D. Collingwood, S. Hunt, L. Wodicka, A. Conway, D. J.  
708 Lockhart, R. W. Davis, B. J. Brewer, and W. L. Fangman. 2001. Replication dynamics of the  
709 yeast genome. *Science* *294*: 115-121.
- 710 Reijns, M. A., Kemp, H., Ding, J., de Procé, S. M., Jackson, A. P., and Taylor, M. S. (2015).  
711 Lagging-strand replication shapes the mutational landscape of the genome. *Nature* *518*,  
712 502-506.
- 713 Samora, C., Saksouk, J., Goswami, P., Wade, B., Singleton, M., Bates, P., Lengronne, A.,  
714 Costa, A., and Uhlmann, F. (2016). Ctf4 Links DNA Replication with Sister Chromatid  
715 Cohesion Establishment by Recruiting the Chl1 Helicase to the Replisome. *Molecular Cell*  
716 *63*, 371-384.
- 717 Sasaki, M., and Kobayashi, T. (2017). Ctf4 Prevents Genome Rearrangements by Suppressing  
718 DNA Double-Strand Break Formation and Its End Resection at Arrested Replication Forks.  
719 *Molecular Cell* *66*, 533-545.e5.
- 720 Shah, K. A., Shishkin, A. A., Voineagu, I., Pavlov, Y. I., Shcherbakova, P. V., and Mirkin, S. M.  
721 (2012). Role of DNA polymerases in repeat-mediated genome instability. *Cell Rep* *2*,  
722 1088-1095.
- 723 Shyian, M., Mattarocci, S., Albert, B., Hafner, L., Lezaja, A., Costanzo, M., Boone, C., and  
724 Shore, D. (2016). Budding Yeast Rif1 Controls Genome Integrity by Inhibiting rDNA  
725 Replication. *PLoS Genet* *12*, e1006414.
- 726 Simon, A. C., Zhou, J. C., Perera, R. L., van, D., Frederick, Evrin, C., Ivanova, M. E., Kilkenny,  
727 M. L., Renault, L., Kjaer, S., Matak-Vinković, D., Labib, K., Costa, A., and Pellegrini, L.  
728 (2014). A Ctf4 trimer couples the CMG helicase to DNA polymerase  $\alpha$  in the eukaryotic  
729 replisome. *Nature* *510*, 293-297.
- 730 Smith, D. J., and Whitehouse, I. (2012). Intrinsic coupling of lagging-strand synthesis to  
731 chromatin assembly. *Nature* *483*, 434-438.
- 732 Song, W., Dominska, M., Greenwell, P. W., and Petes, T. D. (2014). Genome-wide high-  
733 resolution mapping of chromosome fragile sites in *Saccharomyces cerevisiae*. *Proc Natl*  
734 *Acad Sci U S A* *111*, E2210-8.

- 735 Szyjka, S. J., Viggiani, C. J., and Aparicio, O. M. (2005). Mrc1 is required for normal progression  
736 of replication forks throughout chromatin in *S. cerevisiae*. *Mol Cell* *19*, 691-697.
- 737 Tanaka, H., Katou, Y., Yagura, M., Saitoh, K., Itoh, T., Araki, H., Bando, M., and Shirahige, K.  
738 (2009). Ctf4 coordinates the progression of helicase and DNA polymerase alpha. *Genes*  
739 *Cells* *14*, 807-820.
- 740 Taylor, M. R. G., and Yeeles, J. T. P. (2018). The Initial Response of a Eukaryotic Replisome to  
741 DNA Damage. *Molecular Cell* *70*, 1067-1080.
- 742 Tran, P. L. T., Pohl, T. J., Chen, C. F., Chan, A., Pott, S., and Zakian, V. A. (2017). PIF1 family  
743 DNA helicases suppress R-loop mediated genome instability at tRNA genes. *Nat Commun*  
744 *8*, 15025.
- 745 Van Esch, H., Colnaghi, R., Freson, K., Starokadomskyy, P., Zankl, A., Backx, L., Abramowicz,  
746 I., Outwin, E., Rohena, L., Faulkner, C., Leong, G. M., Newbury-Ecob, R. A., Challis, R. C.,  
747 Ünnap, K., Jaeken, J., Seuntjens, E., Devriendt, K., Burstein, E., Low, K. J., and  
748 O'Driscoll, M. (2019). Defective DNA Polymerase  $\alpha$ -Primase Leads to X-Linked Intellectual  
749 Disability Associated with Severe Growth Retardation, Microcephaly, and Hypogonadism.  
750 *Am J Hum Genet* *104*, 957-967.
- 751 Villa, F., Simon, A. C., Ortiz Bazan, M. A., Kilkenny, M. L., Wirthensohn, D., Wightman, M.,  
752 Matak-Vinkovic, D., Pellegrini, L., and Labib, K. (2016). Ctf4 Is a Hub in the Eukaryotic  
753 Replisome that Links Multiple CIP-Box Proteins to the CMG Helicase. *Mol Cell* *63*, 385-  
754 396.
- 755 Wu, C. A., Zechner, E. L., Reems, J. A., McHenry, C. S., and Marians, K. J. (1992). Coordinated  
756 leading- and lagging-strand synthesis at the *Escherichia coli* DNA replication fork. V.  
757 Primase action regulates the cycle of Okazaki fragment synthesis. *J Biol Chem* *267*, 4074-  
758 4083.
- 759 Yadav, T., and Whitehouse, I. (2016). Replication-Coupled Nucleosome Assembly and  
760 Positioning by ATP-Dependent Chromatin-Remodeling Enzymes. *Cell Rep*
- 761 Yeeles, J. T., Janska, A., Early, A., and Diffley, J. F. (2017). How the Eukaryotic Replisome  
762 Achieves Rapid and Efficient DNA Replication. *Mol Cell* *65*, 105-116.
- 763 Yoshida, K., Bacal, J., Desmarais, D., Padioleau, I., Tsaponina, O., Chabes, A., Pantesco, V.,  
764 Dubois, E., Parrinello, H., Skrzypczak, M., Ginalski, K., Lengronne, A., and Pasero, P.  
765 (2014). The histone deacetylases sir2 and rpd3 act on ribosomal DNA to control the  
766 replication program in budding yeast. *Mol Cell* *54*, 691-697.
- 767 Zhu, W., Ukomadu, C., Jha, S., Senga, T., Dhar, S. K., Wohlschlegel, J. A., Nutt, L. K.,  
768 Kornbluth, S., and Dutta, A. (2007). Mcm10 and And-1/CTF4 recruit DNA polymerase  
769 alpha to chromatin for initiation of DNA replication. *Genes Dev* *21*, 2288-2299.
- 770
- 771

772

## 773 LEGENDS TO FIGURES

### 774 **Figure 1. Okazaki fragments increase in length when Pol $\alpha$ is limiting.**

775 **(A).** Western blot against 13xMyc-tagged Pol1 from *S. cerevisiae* from a wild-type or *GDPOL1*  
776 strain, as indicated, shifted to YPD or YEP + 3% raffinose (hereafter, media) supplemented with  
777 various concentrations of galactose. The lower band indicated by an asterisk is a degradation  
778 product resulting from degron-tagging.

779 **(B).** Schematic of experimental workflow for Okazaki fragment analysis and sequencing (also  
780 see methods).

781 **(C, D).** Alkaline agarose gel analysis of end-labeled Okazaki fragments from a wild type (C) or  
782 *GDPOL1* (D) strain, shifted to YPD or media supplemented with galactose as indicated.

783 **(E).** Southern blot using a whole genome probe, on Okazaki fragments from a wild type or  
784 *GDPOL1* strain shifted to media with the indicated sugar concentrations.

785 **(F, G).** Distribution of Okazaki fragment 5' ends around consensus nucleosome dyads (Jiang  
786 and Pugh, 2009) for a wild-type (F) or *GDPOL1* (G) strain shifted to media containing the  
787 indicated concentration of galactose. Data for Okazaki fragment 3' ends in *GDPOL1* are in Fig.  
788 S1F

### 789 **Figure 2. Origin firing efficiency is decreased for all replication origins when Pol $\alpha$ levels** 790 **are reduced**

792 **(A).** Okazaki fragment distributions from a wild-type (black) or *GDPOL1* strain shifted to the  
793 indicated media. A ~400 kb region from the left arm of chromosome 4 is shown, and the late  
794 and early replicating regions are annotated.

795 **(B).** Origin efficiency calculated as OEM (see methods) in wild-type or *GDPOL1* cells shifted to  
796 the indicated concentration of galactose. Data is in the form of box and whisker plots with the

797 ends of the boxes being the upper and lower quartiles, the median is denoted by the line within  
798 the box, and the whiskers indicate the highest and lowest data points. Origin efficiency was  
799 calculated as in (McGuffee et al., 2013), using origin locations annotated in the same study.  
800 Significance was calculated by unpaired t-test; \*\*\*\*  $p < 0.0001$ , \*\*\*  $p < 0.0005$ , \*  $p < 0.05$ . Data from  
801 the *GDPOL1* strain are the average of three replicates.

802 **(C).** Meta-analysis of the fraction of Okazaki fragments mapping to the Watson strand  
803 (corresponding to leftward-moving replication forks) around all 283 origins normalized to the  
804 maximum, using the same origin list as above.

805 **(D).** Scatter plot comparing origin firing efficiency in *GDPOL1* cells at 0.014% galactose, to wild-  
806 type cells in 0.5% galactose. Analogous comparisons to other galactose concentrations, and  
807 correlations between replicates, are in Fig. S2.

808 **(E).** Firing efficiency for origins with replication timing below (early) or above (late) the median  
809 replication timing for origins in our dataset. Significance was calculated by unpaired t-test; \*\*\*\*  
810  $p < 0.0001$ .

811 **(F).** Firing efficiency for origins with Forkhead (Fkh) status: activated, repressed, or  
812 independent. Using the Fkh status determined in Knott et al., 2012. Significance was calculated  
813 by unpaired t-test; \*\*\*\*  $p < 0.0001$ , \*  $p < 0.05$ .

814  
815 **Figure 3. Global decreases in origins firing from Pol  $\alpha$  depletion leads to a proportion of**  
816 **cells stalling in early S phase**

817 **(A).** Schematic of experimental workflow for whole genome sequencing (also see methods).

818 **(B)** Read depth of chromosome 4, normalized to G1 and RPM, then smoothed through a Loess  
819 regression. Poorly mapped regions were removed for analysis (Table S2). Galactose  
820 concentrations are indicated. Early and late replication regions (LRR) are marked, as are the



821 three earliest firing origins on chromosome 4: ARS428 (12min), ARS429 (14min), ARS453  
822 (12min).

823 **(C, D).** Coverage from pan-S-phase samples mapped around replication origins. Either all 283  
824 origins (C) or the earliest firing 22 origins compared to the other 261 origins (D) are shown.  
825 Read depth was normalized to G1 and smoothed to 1kb. Note the different y-axis scale for the  
826 earliest origins in D.

827

828 **Figure 4. Ctf4 maintains Okazaki fragment length at moderate Pol  $\alpha$  concentrations but is**  
829 **dispensable for origin firing *in vivo* unless Pol  $\alpha$  is severely limiting**

830 **(A, B, C).** Alkaline agarose gel analysis of end-labeled Okazaki fragments from a wild type or  
831 *GDPOL1;ctf4 $\Delta$*  strain (A&B), or *GDpol1-4A* (C) as indicated, shifted to media containing various  
832 concentrations of galactose. Note that the range of galactose concentrations in A is significantly  
833 higher than in other figure panels. Traces of lanes are shown for wild type YPD (black), or  
834 *GDPOL1* 0.5% (gray) and 0.05% galactose (blue).

835 **(D, E).** Replication origin efficiency, as in Fig. 2B, for *GDPOL1;ctf4 $\Delta$*  (D) or *GDpol1-4A* (E) cells  
836 at low galactose concentrations. Data were calculated and analyzed as in Fig. 2B.

837 **(F).** Distribution of Okazaki fragment 5' termini around consensus nucleosome dyads, as in Fig.  
838 1F,G, for each indicated strain shifted to media containing 0.05% galactose. Data were  
839 calculated and analyzed as in Fig. 1F&G.

840

841 **Figure 5. The checkpoint is required for viability under conditions of limiting origin firing,**  
842 **but not increased Okazaki fragment size.**

843 **(A).** Western blot against Rad53 from asynchronous *GDPOL1* cells shifted to the indicated  
844 media. A wild-type strain grown in YPGal  $\pm$  0.1% MMS were used as negative and positive  
845 controls for Rad53 hyperphosphorylation.

846 **(B).** Serial dilution spot tests to assay the growth of *GDPOL1* strains carrying additional  
847 mutations (*mec1Δ;smi1Δ*, *rad9Δ*, *mrc1Δ*, *rad9Δ;mrc1Δ;smi1Δ*) at the indicated galactose  
848 concentrations.

849 **(C).** Southern blot as in Fig. 3B, for a *mec1Δ;GDPOL1* strain shifted to various galactose  
850 concentrations.

851 **(D).** Serial dilution spot tests to assay the growth of *GDPOL1* strains carrying additional  
852 mutations (*rad9Δ*, *mrc1<sup>AQ</sup>*, *rad9Δ;mrc1<sup>AQ</sup>*) at the indicated galactose concentrations.

853 **(E).** Serial dilution spot tests to assay the growth of *ctf4Δ;GDPOL1* or *GDpol1-4A* strains with or  
854 without additional deletion of *MEC1*.

855  
856 **Figure 6. Model of Pol  $\alpha$  recruitment for leading- and lagging-strand priming in *S.***

857 ***cerevisiae***

858  
859

## Porcella et al., Figure 1

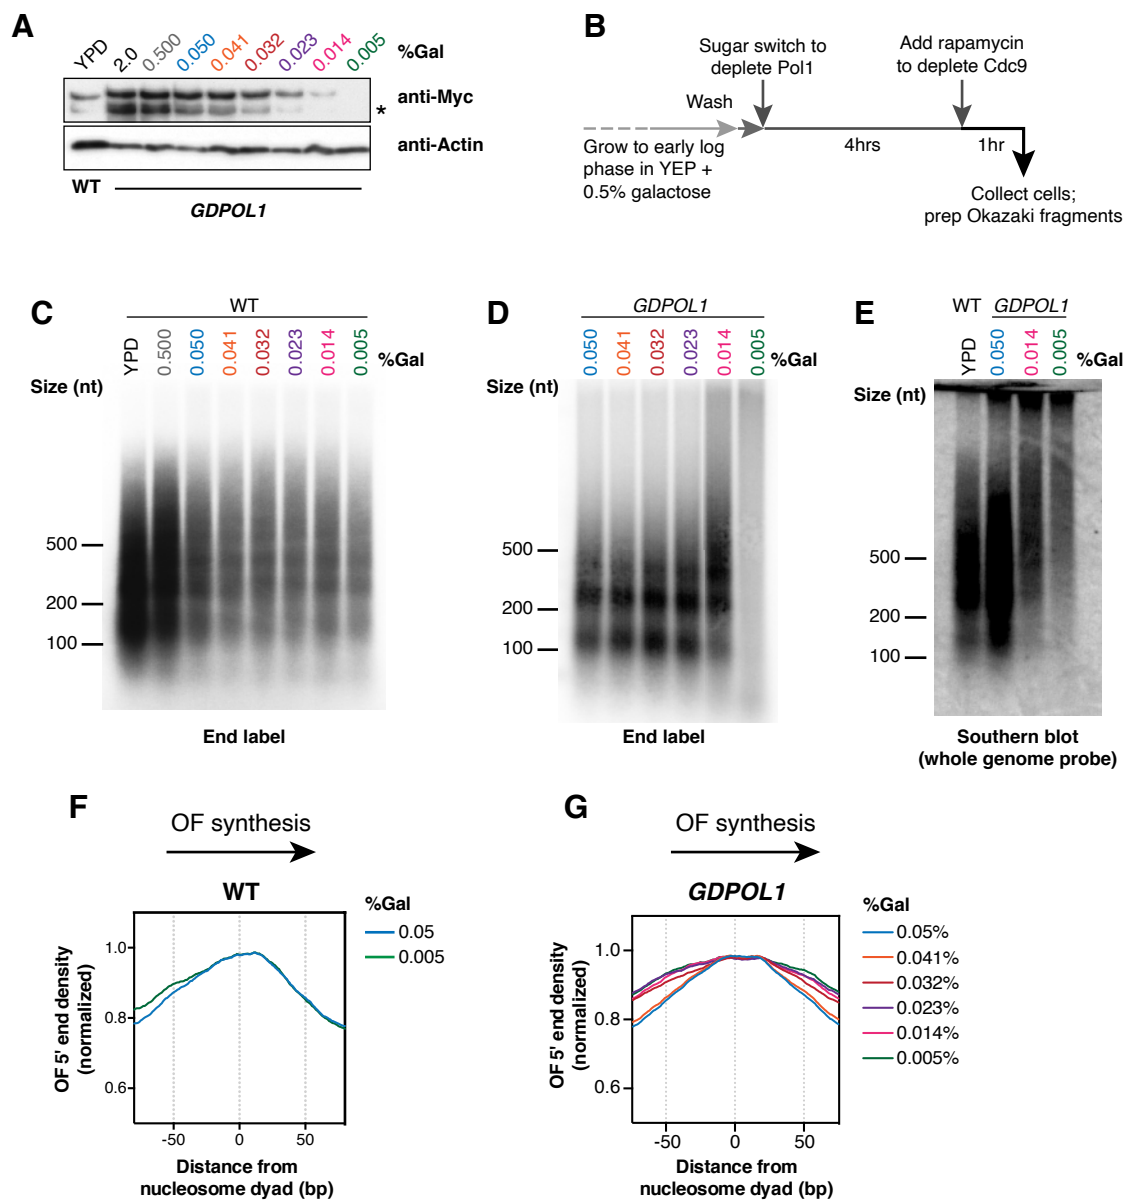

## Porcella et al., Figure 2

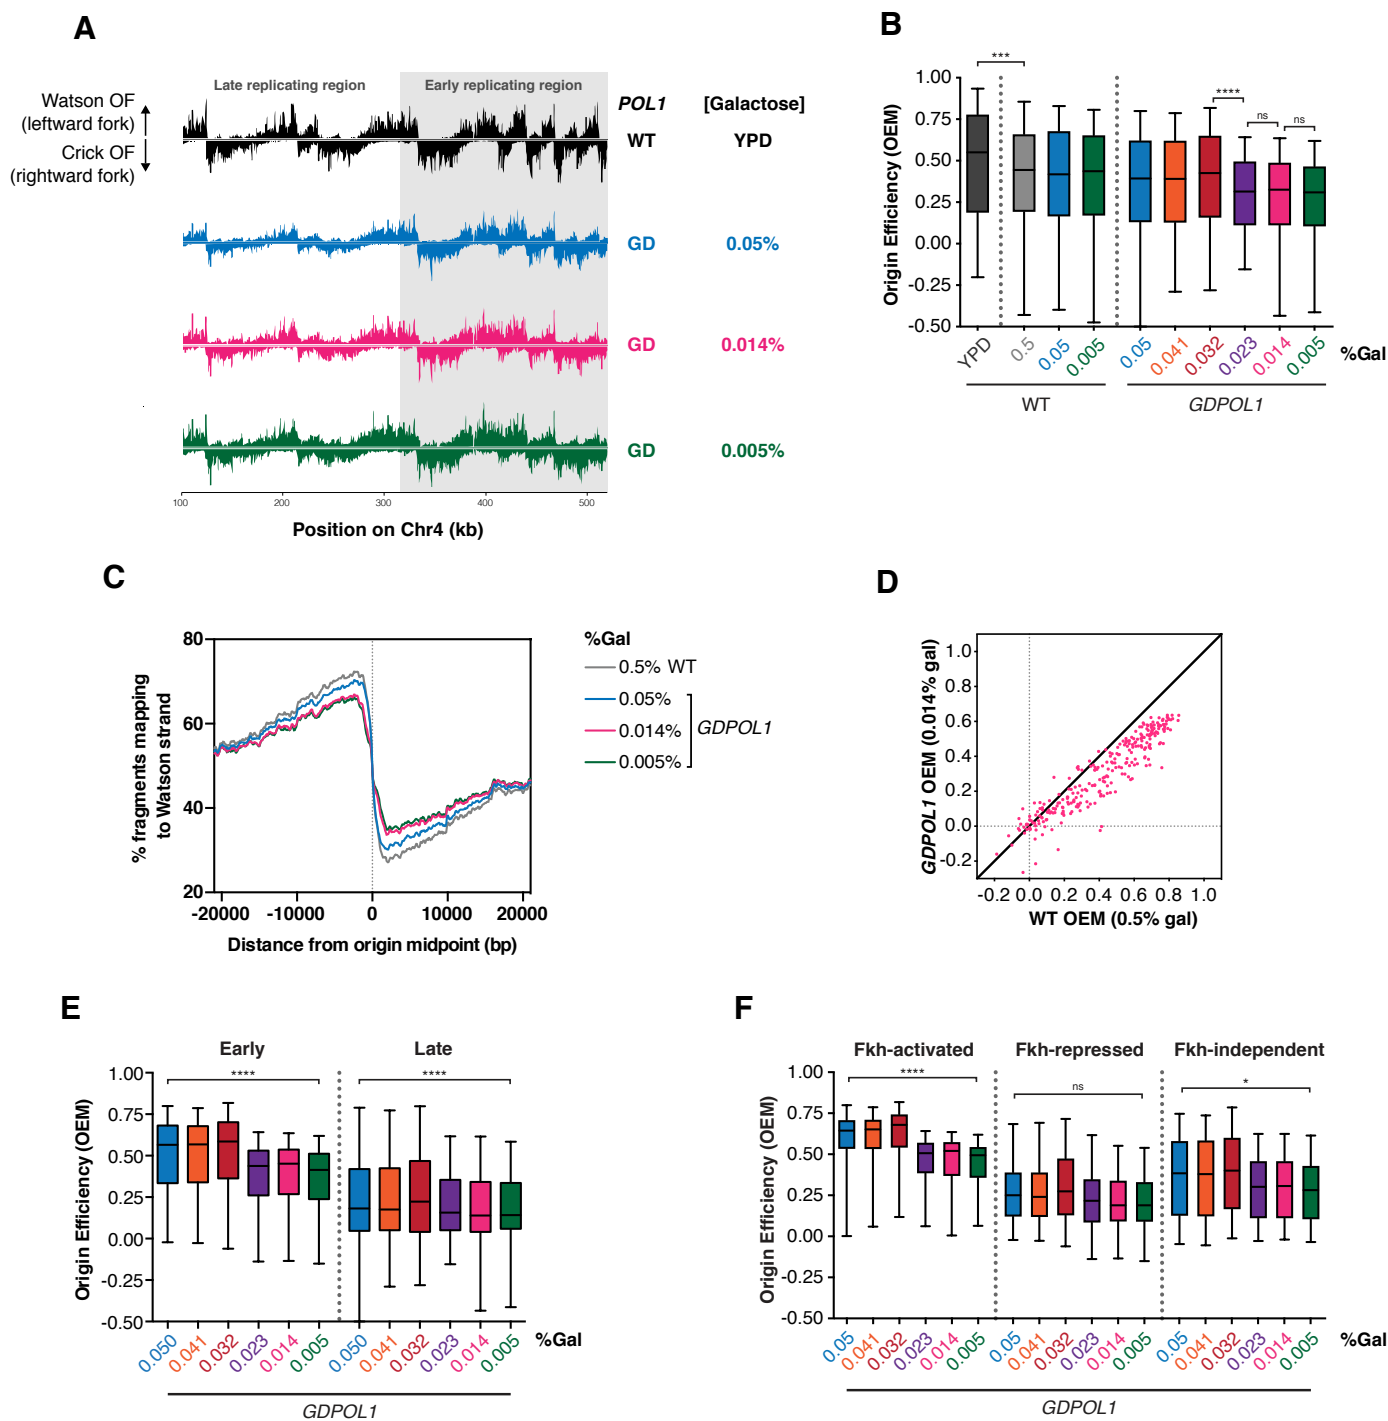

## Porcella et al., Figure 3

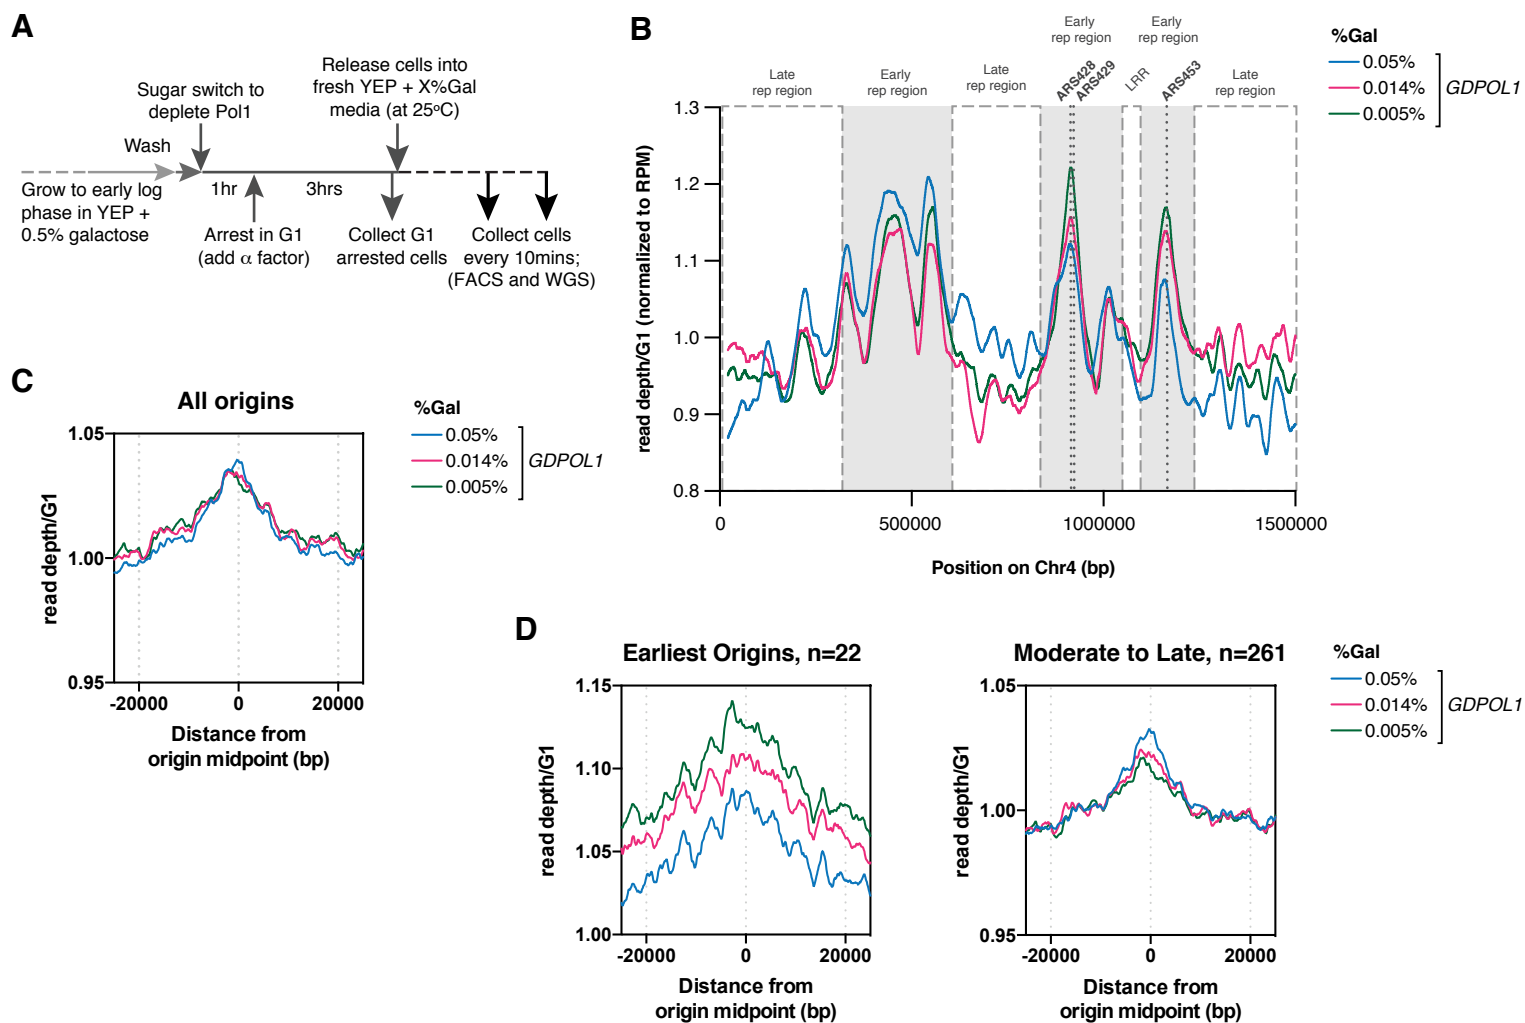

## Porcella et al., Figure 4

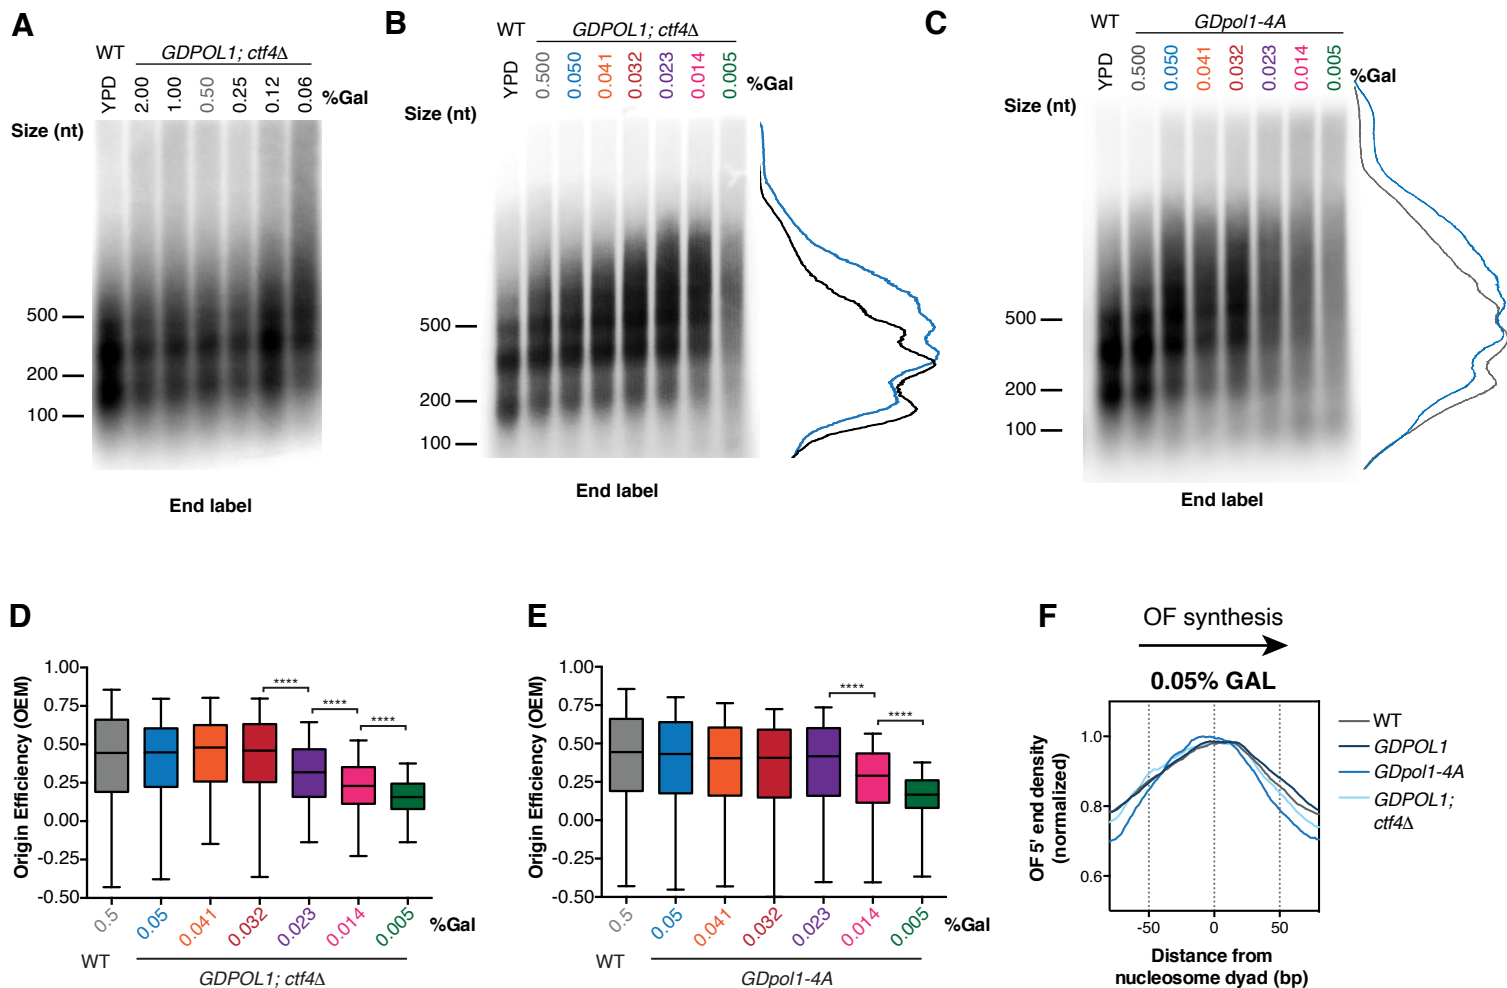

## Porcella et al., Figure 5

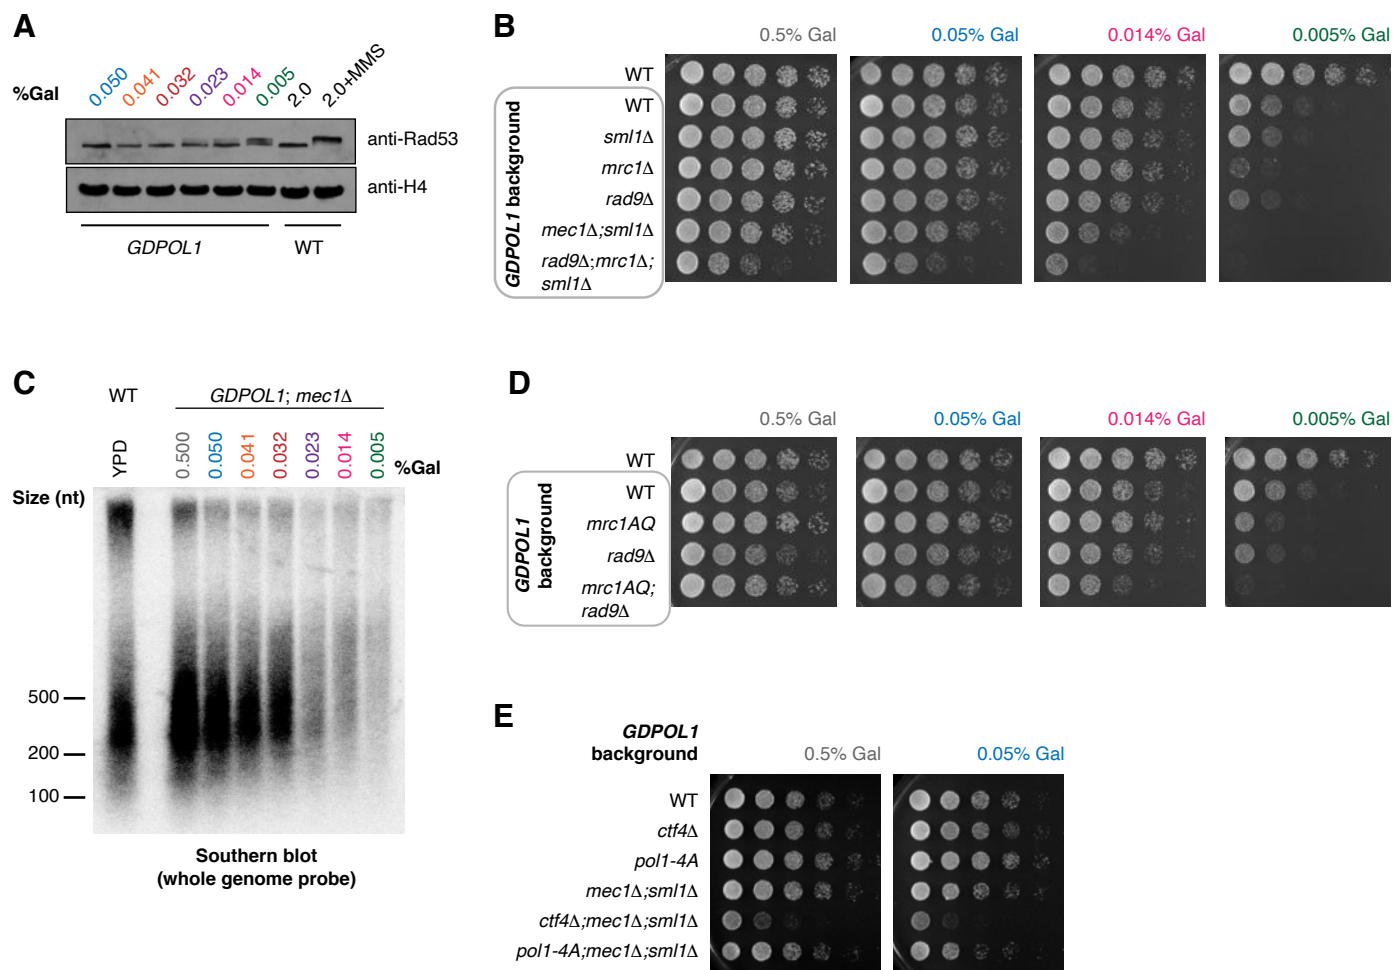

**Porcella et al., Figure 6**

**A. With Ctf4-mediated recruitment of Pol  $\alpha$**

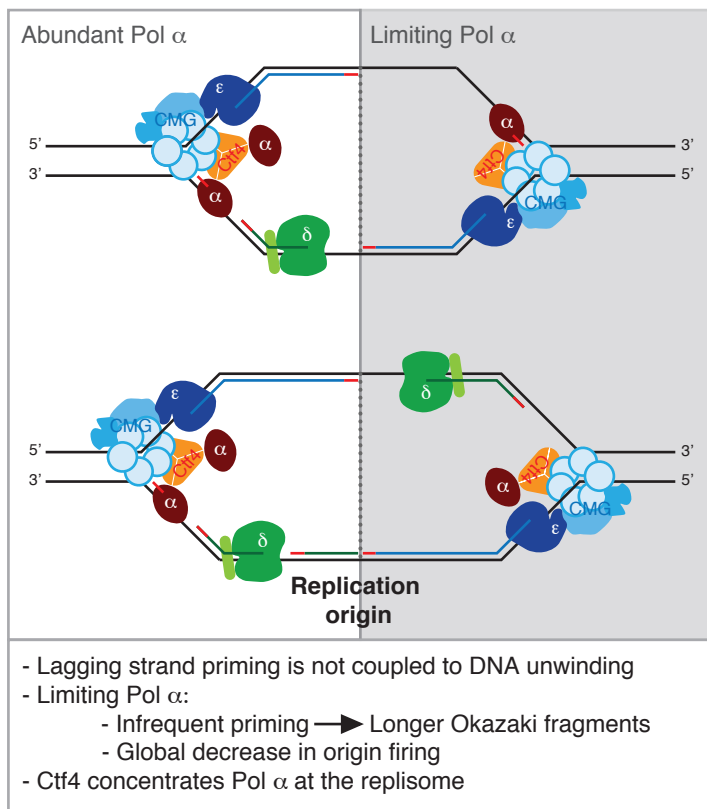

**B. Without Ctf4-Pol  $\alpha$  interactions**

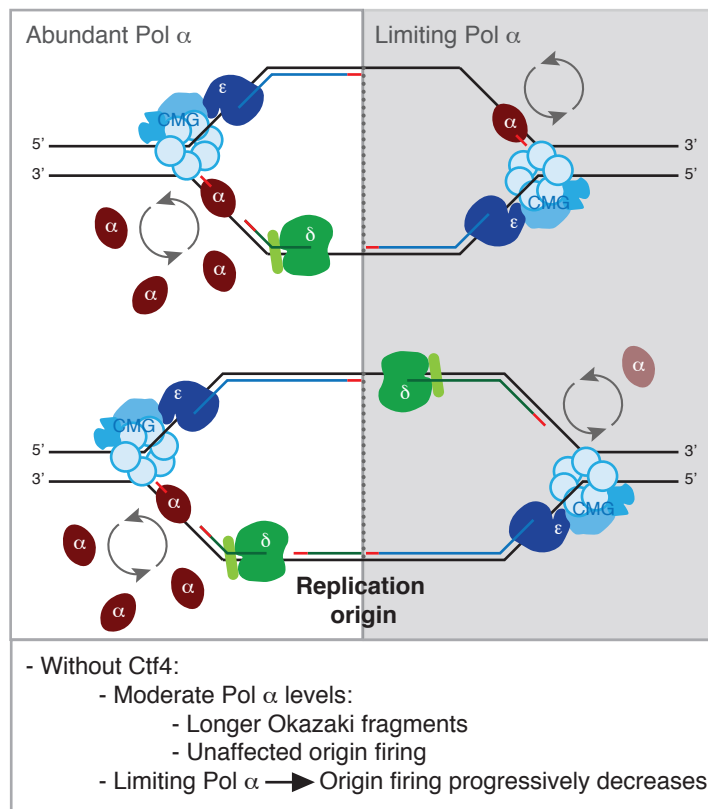



860

## 861 LEGENDS TO SUPPLEMENTARY FIGURES

### 862 Figure S1 (Associated with Fig 1)

863 (A). Western blot against 13xMyc-tagged Pol1 from wild-type or *GDPOL1* cells at the indicated  
864 sugar concentration, released from alpha-factor arrest for the indicated time. The GDPol1-  
865 specific degradation product is indicated by an asterisk.

866 (B). Timecourse of Okazaki fragment enrichment during Cdc9 nuclear depletion by anchor away  
867 (Haruki et al., 2008). Okazaki fragments were prepared and labeled as in Fig. 1C, and as  
868 previously described (Smith and Whitehouse, 2012).

869 (C-E). Representative replicate Okazaki fragment end-labeling gels for wild-type (C) and  
870 *GDPOL1* (D-E) at the indicated galactose concentrations. Traces adjacent to the plots in D&E  
871 indicate the change in size distribution of Okazaki fragments at 0.014% (pink) and 0.005%  
872 (green) galactose.

873 (F). Distribution of Okazaki fragment 3' ends around consensus nucleosome dyads (Jiang and  
874 Pugh, 2009) in the *GDPOL1* strain shifted to media containing the indicated concentration of  
875 galactose

876

### 877 Figure S2 (Associated with Fig 2)

878 (A). Origin efficiency replicate comparisons for data from the *GDPOL1* strain shown in Fig. 2B  
879 each of three replicates are plotted against each other and indicated by color.

880 (B). Comparison of origin efficiency data from each replicate from *GDPOL1* cells shifted to the  
881 indicated concentration of galactose. Significance was calculated by unpaired t-test; \*\*\*\*  
882  $p < 0.0001$ , \*  $p < 0.05$ .

883 (C). Scatter plots comparing origin firing efficiency in *GDPOL1* cells at various galactose  
884 concentrations, to wild-type cells in 0.5% galactose.

885

886 **Figure S3 (Associated with Fig 2)**

887 **(A).** Doubling times for wild-type or *GDPOL1* strains in YEP + 3% raffinose, supplemented with  
888 the indicated concentration of galactose. Data are the average of at least three replicates in  
889 each case.

890 **(B).** DNA content, assayed by flow cytometry, of an arrest release of wild type or *GDPOL1* cells  
891 also analyzed in A.

892 **(C).** DNA content, assayed by flow cytometry, of asynchronous cells post 4h sugar switch of  
893 wild type or *GDPOL1* cells.

894 **(D).** DNA content, assayed by flow cytometry, *GDPOL1* cells, released into S-phase after 4h  
895 sugar switch in G1. The samples collected at these time points were used to generate  
896 sequencing libraries for the analysis shown in Fig. 3.

897

898 **Figure S4**

899 Analysis of replication-fork direction around 93 origin-distal tRNA genes (Osmundson et al.,  
900 2017) in *GDPOL1* cells grown at various galactose concentrations. Increased replication-fork  
901 stalling or arrest at these sites would manifest as a decrease at or after the midpoint of the gene  
902 (Osmundson et al., 2017).

903

904 **Figure S5 (Associated with Fig 3)**

905 **(A-C).** Representative replicate end-labeling gel (A, C) or Southern blot (B), on Okazaki  
906 fragments from a *GDPOL1;ctf4Δ* (A, B) or *GDpol1-4A* (C) strain shifted to media shifted to low  
907 galactose concentrations. Traces of YPD (black) and 0.05% galactose (blue) lanes on the right.  
908 A control lane for wild-type cells grown in YPD is included on each gel.

909 **(D)**. Serial dilution spot tests to assay the growth of *GDPOL1* strains with or without FRB  
910 tagging of CDC9 and/or *ctf4Δ* or *pol1-4A* mutations.

911 **(E)**. The rDNA repeat is expanded in *ctf4Δ*; *GDPOL1* cells. The proportion of sequencing reads  
912 mapping to the rDNA is indicated. Data represent the mean  $\pm$  SD of all sequencing datasets  
913 used for analysis in figures 2&3.

914 **(F-G)**. Distribution of Okazaki fragment 5' (left panel) and 3' ends (right panel) around  
915 consensus nucleosome dyads (Jiang and Pugh, 2009) in the *GDPOL1;ctf4Δ* (F) or *GDpol1-4A*  
916 strain (G) shifted to media containing various galactose concentrations.

917 **Figure S6 (Associated with Fig 3)**

918 **(A, B)**. Origin efficiency replicate comparisons for data from the *ctf4Δ;GDPOL1* strain shown in  
919 Fig. 3D (A) and the *GDpol1-4A* strain show in Fig. 3F (B).

920

921 **Figure S7 (Associated with Fig 4)**

922 **(A, B, C)**. Firing efficiency for origins separated by Fkh status or replication timing for the data  
923 sets in Fig. 4. Significance was calculated by unpaired t-test; \*\*\*\*  $p < 0.0001$ , \*  $p < 0.05$ .

924

925 **Figure S8 (Associated with Fig 4)**

926 **(A, B)**. Serial dilution spot tests to assay the growth of *GDPOL1* strains carrying additional  
927 mutations (*mec1Δ*; *sml1Δ*, *rad9Δ*, *mrc1Δ*, *mrc1AQ*) at the indicated galactose concentrations. A  
928 selection of these concentrations is shown in Fig. 4A-B

929 **(C,D)**. Serial dilution spot tests of the indicated strains with or without 1 mM hydroxyurea (C) or  
930 with or without 0.008% methyl methanesulfonate (D). Note that the full ranges of galactose  
931 concentrations were independently plated as loading/growth controls for both C and D.

## Porcella et al., Figure S1, associated with Figure 1

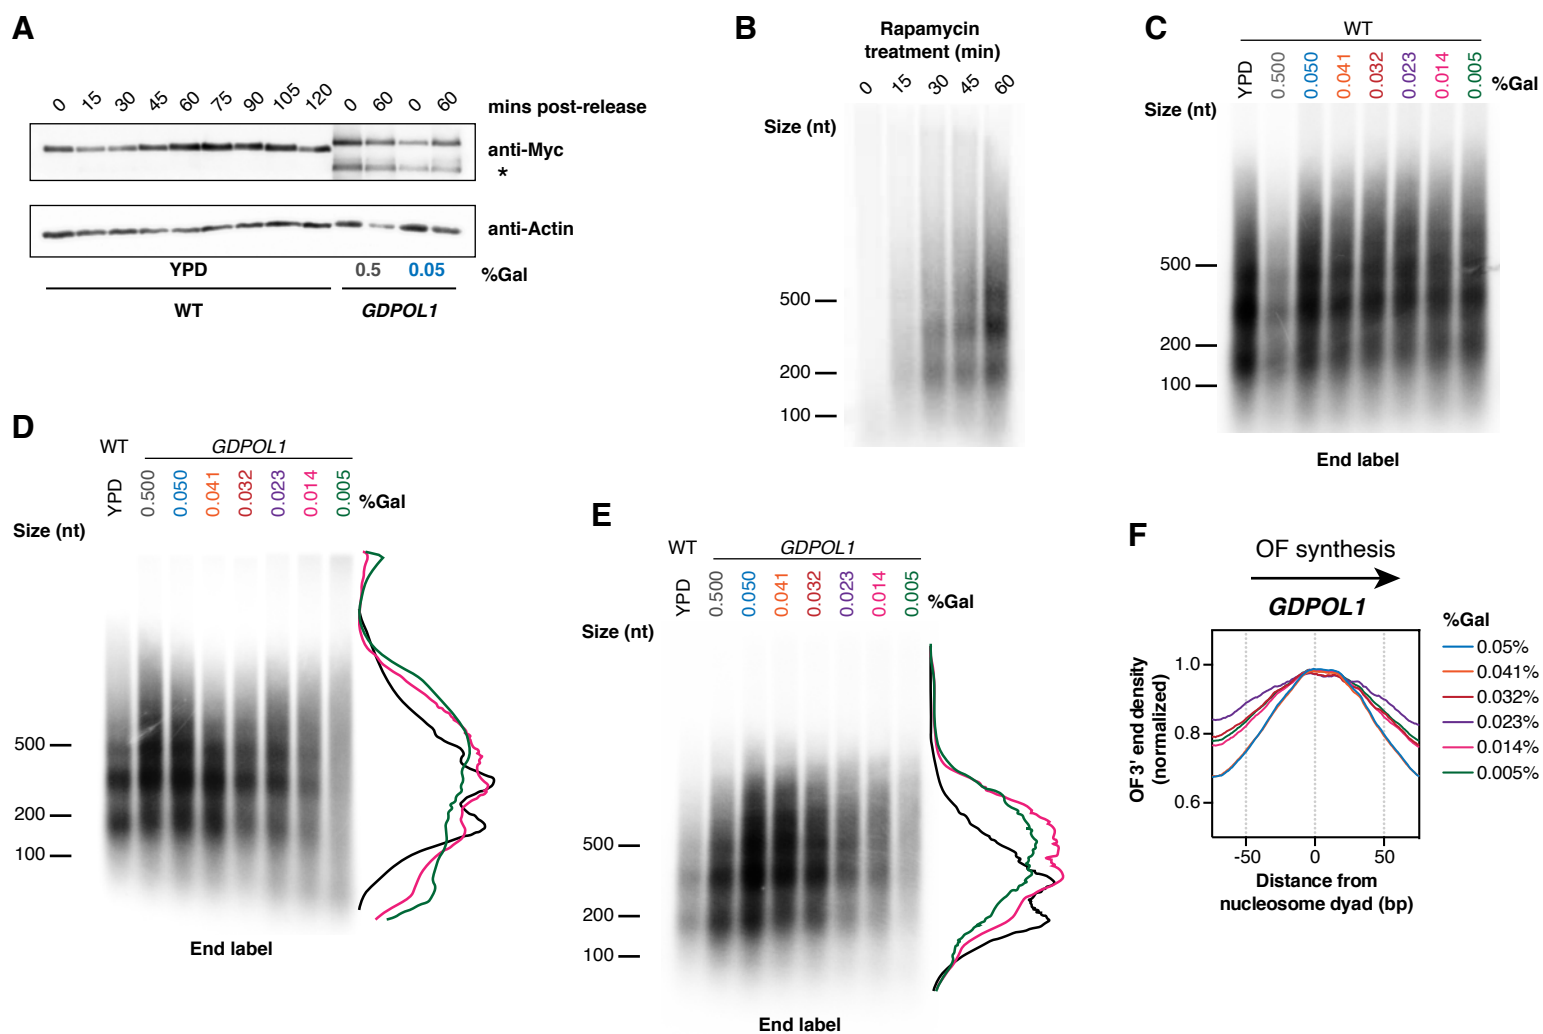

Porcella et al., Figure S2, associated with Figure 2

**A OEM correlations across replicates**

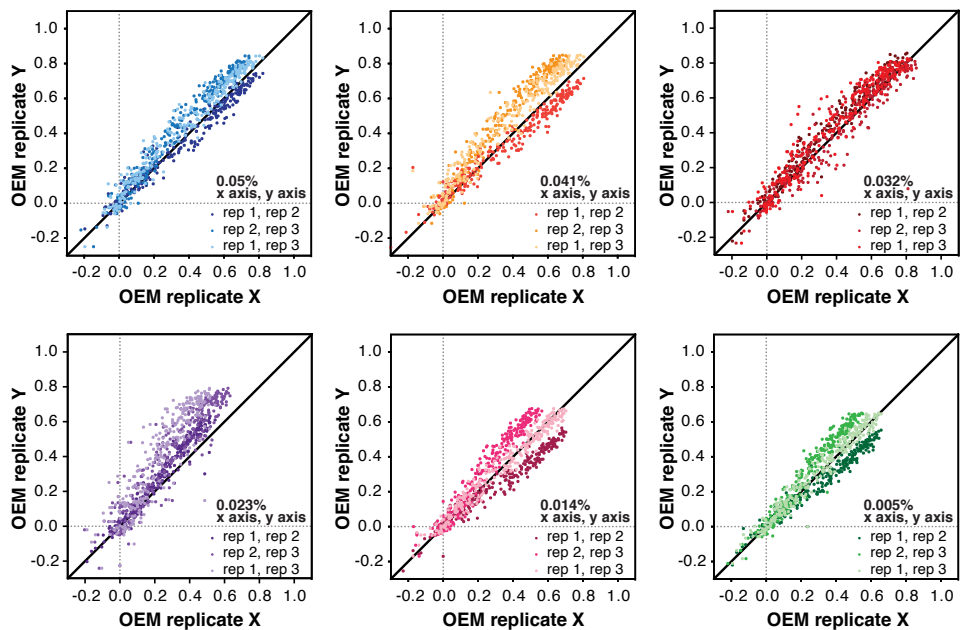

**B**

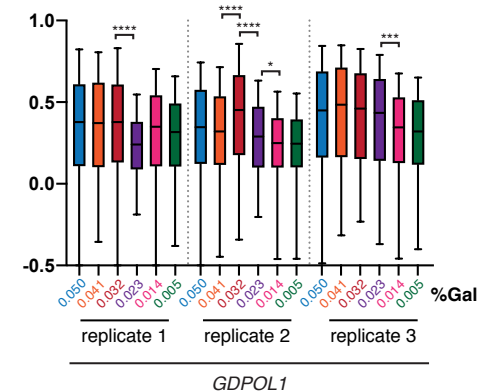

**C OEM change relative to unperturbed cells**

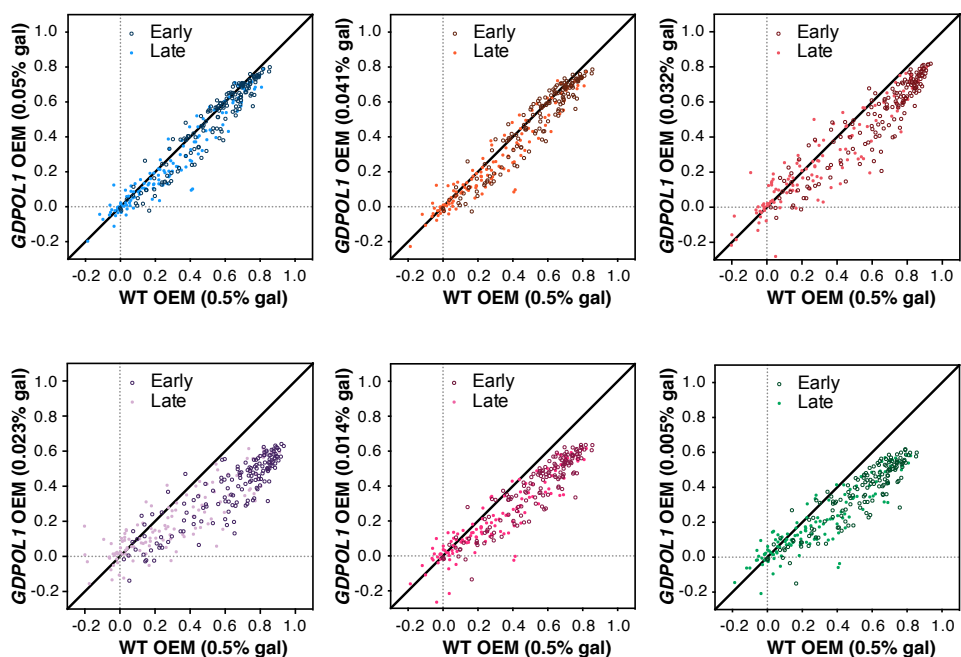

**Porcella et al., Figure S3, associated with Figure 1**

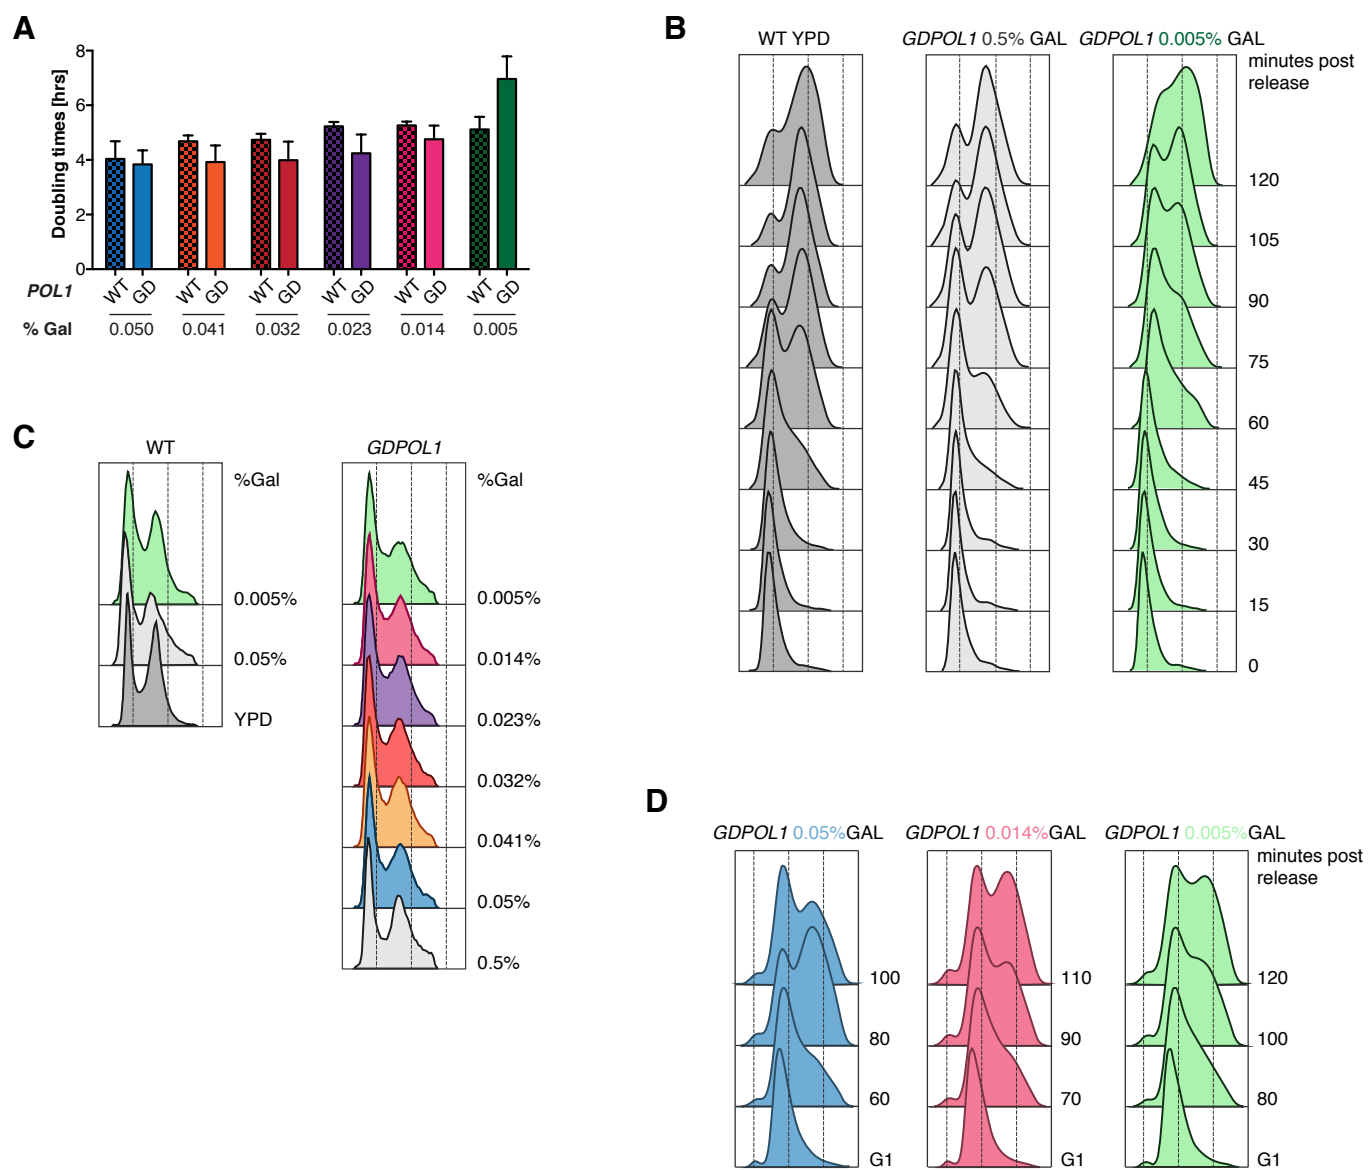

## Porcella et al., Figure S4, associated with Figure 2

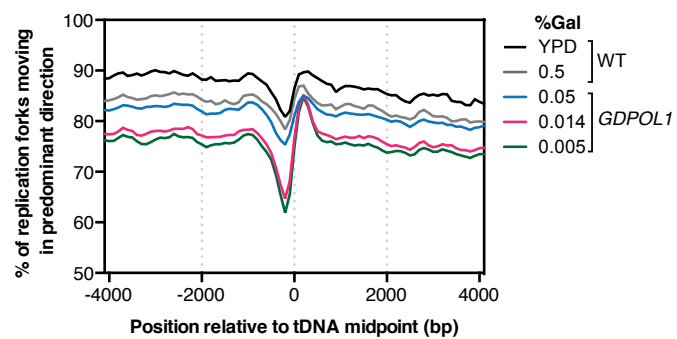

**Porcella et al., Figure S5, associated with Figure 4**

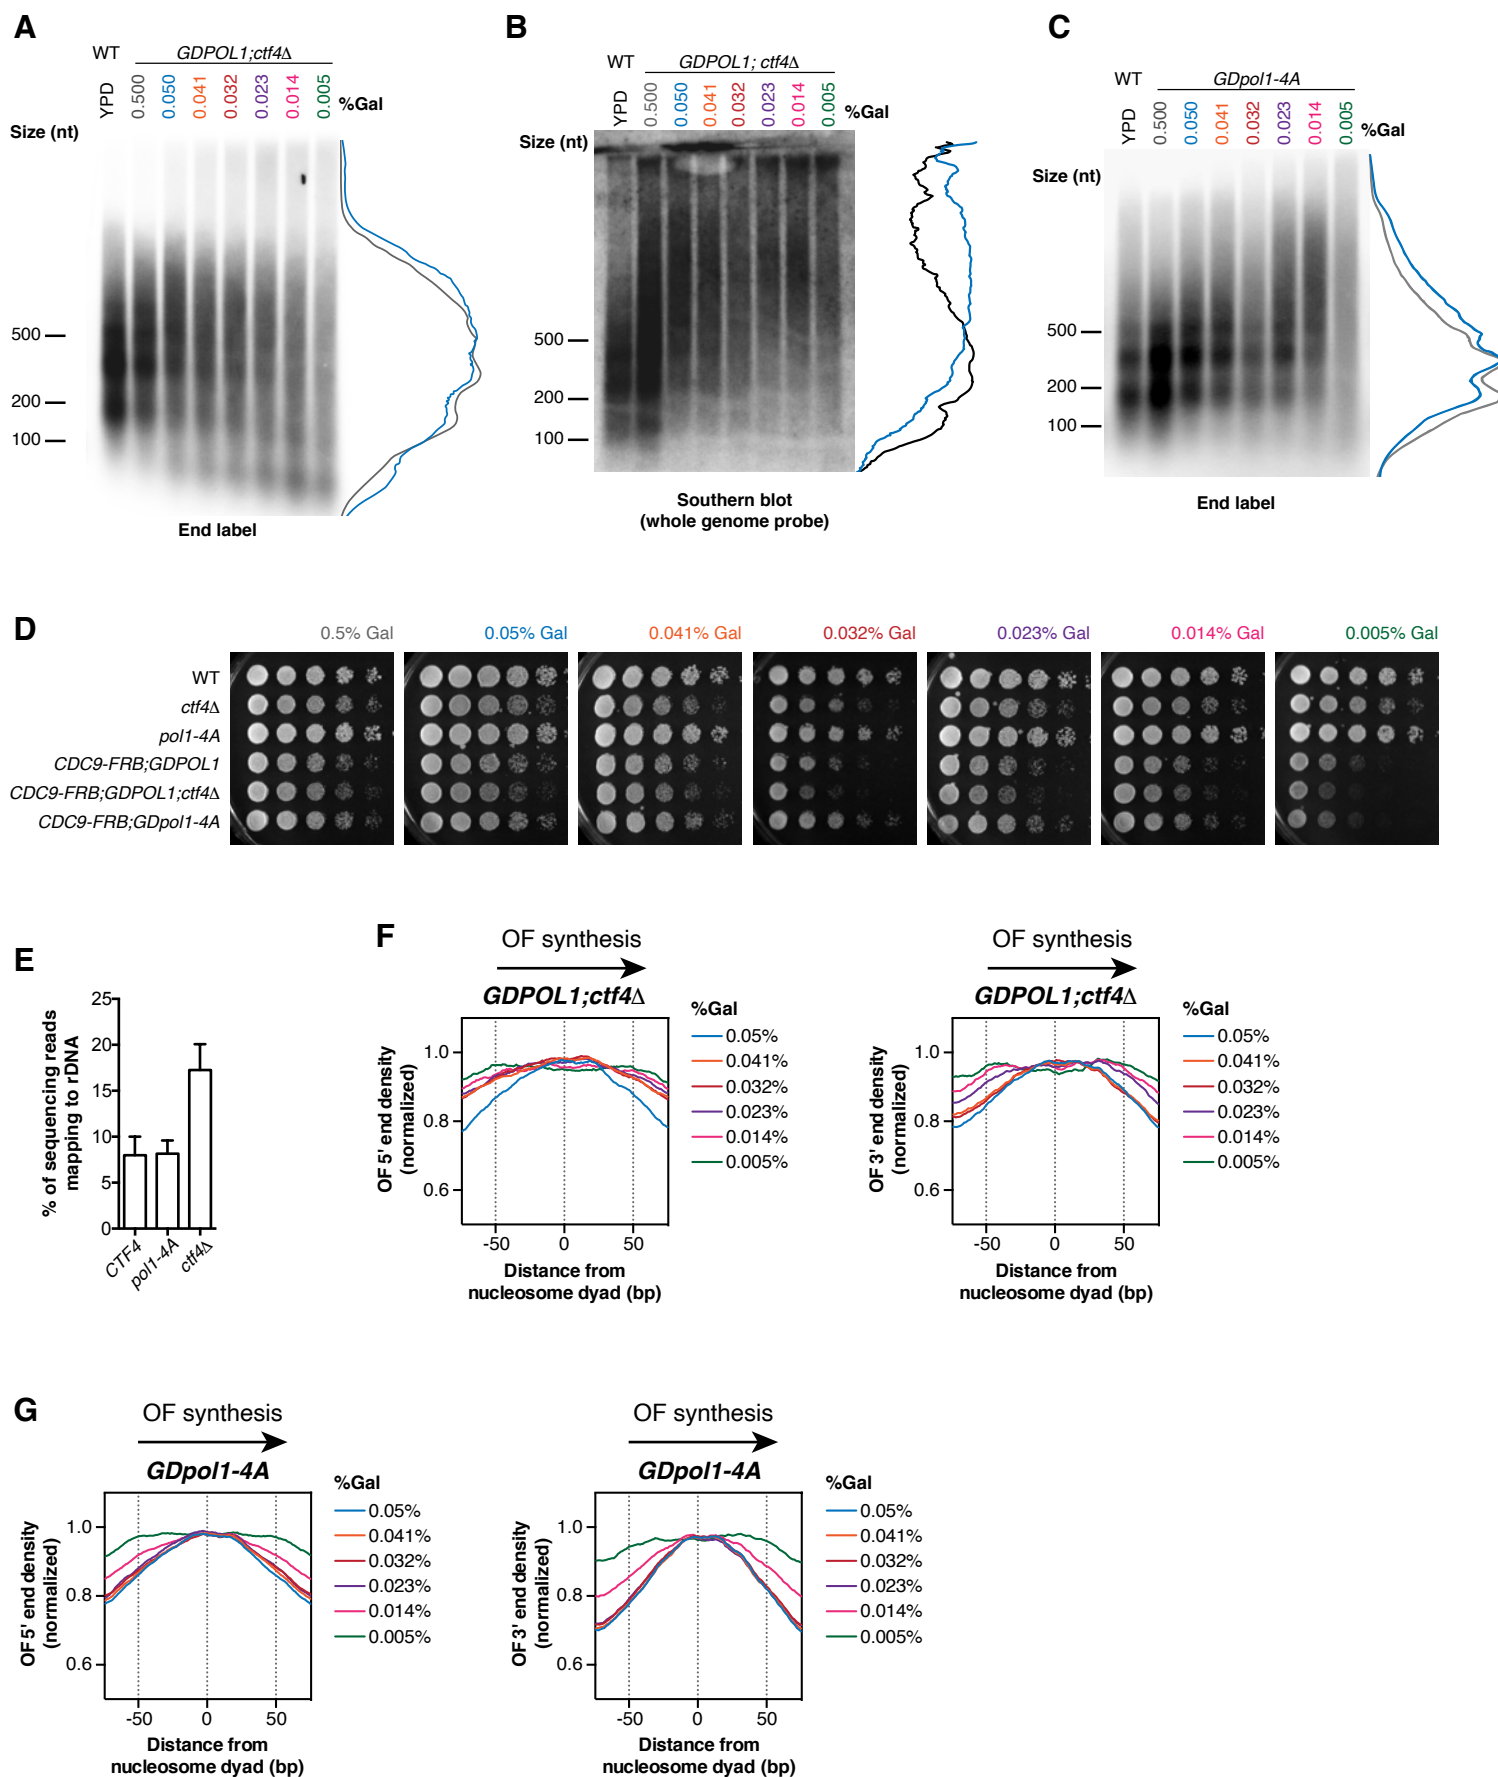



Porcella et al., Figure S6, associated with Figure 4

**A OEM correlations across replicates (*GDPOL1*, *ctf4* $\Delta$ )**

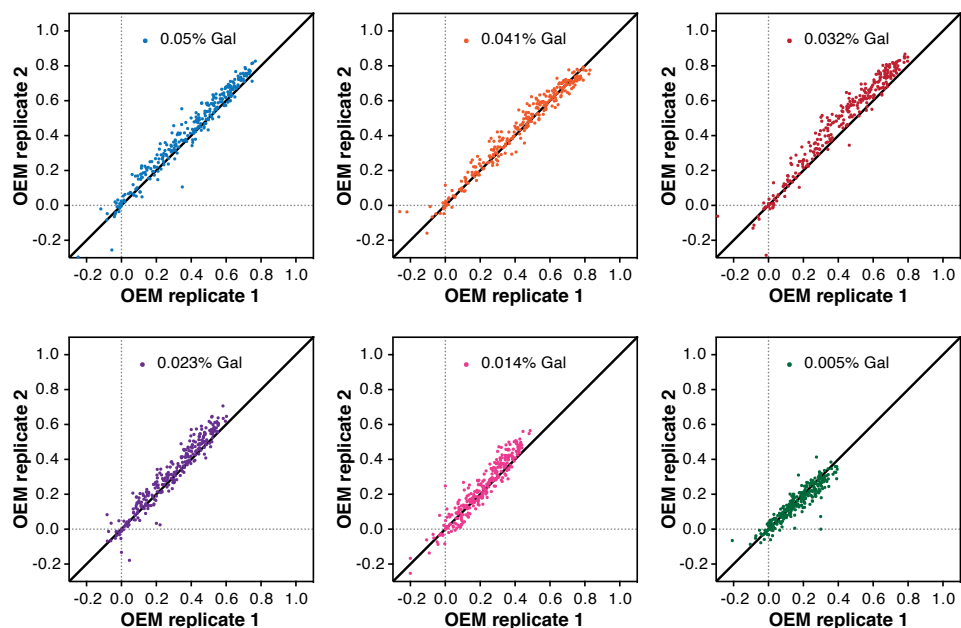

**B OEM correlations across replicates (*GDpol1-4A*)**

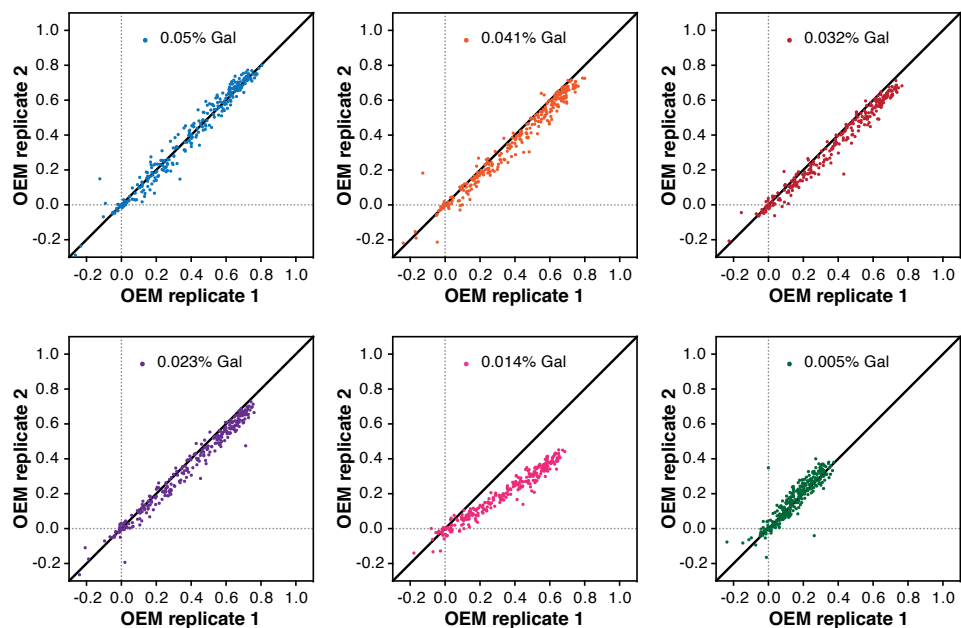

## Porcella et al., Figure S7, associated with Figure 4

### A. *GDPOL1-4A*

OEMs separated by forkhead status

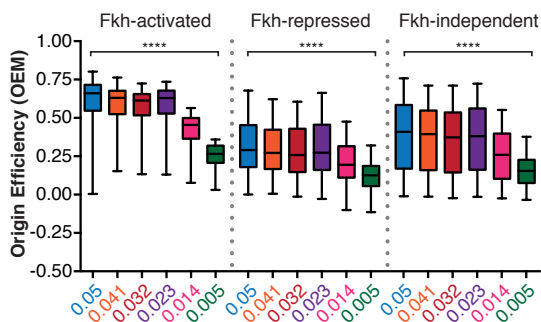

OEMs separated by timing

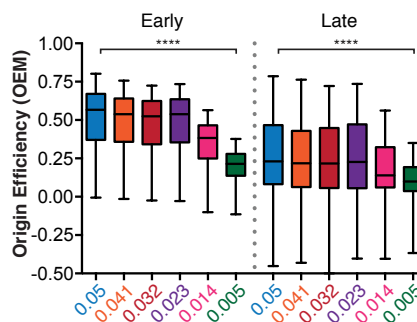

### B. *GDPOL1; ctf4Δ*

OEMs separated by forkhead status

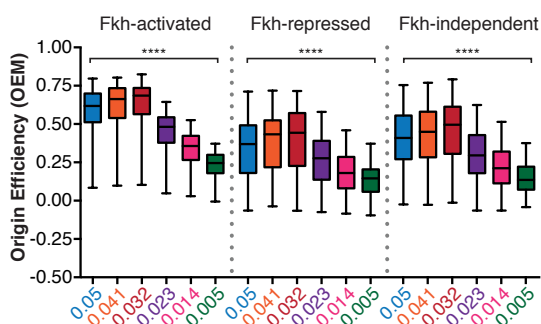

OEMs separated by timing

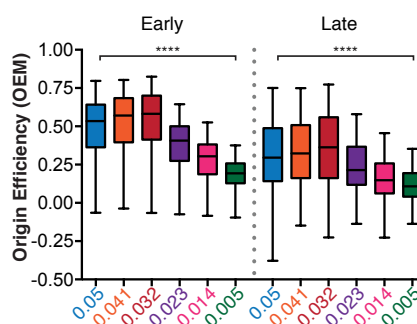

### C. WT

OEMs separated by forkhead status

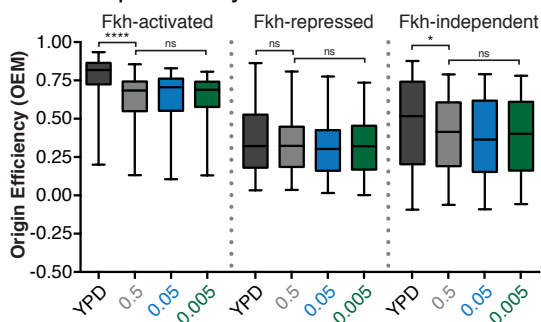

OEMs separated by timing

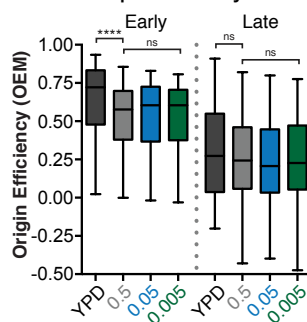

**Porcella et al., Figure S8, associated with Figure 5**

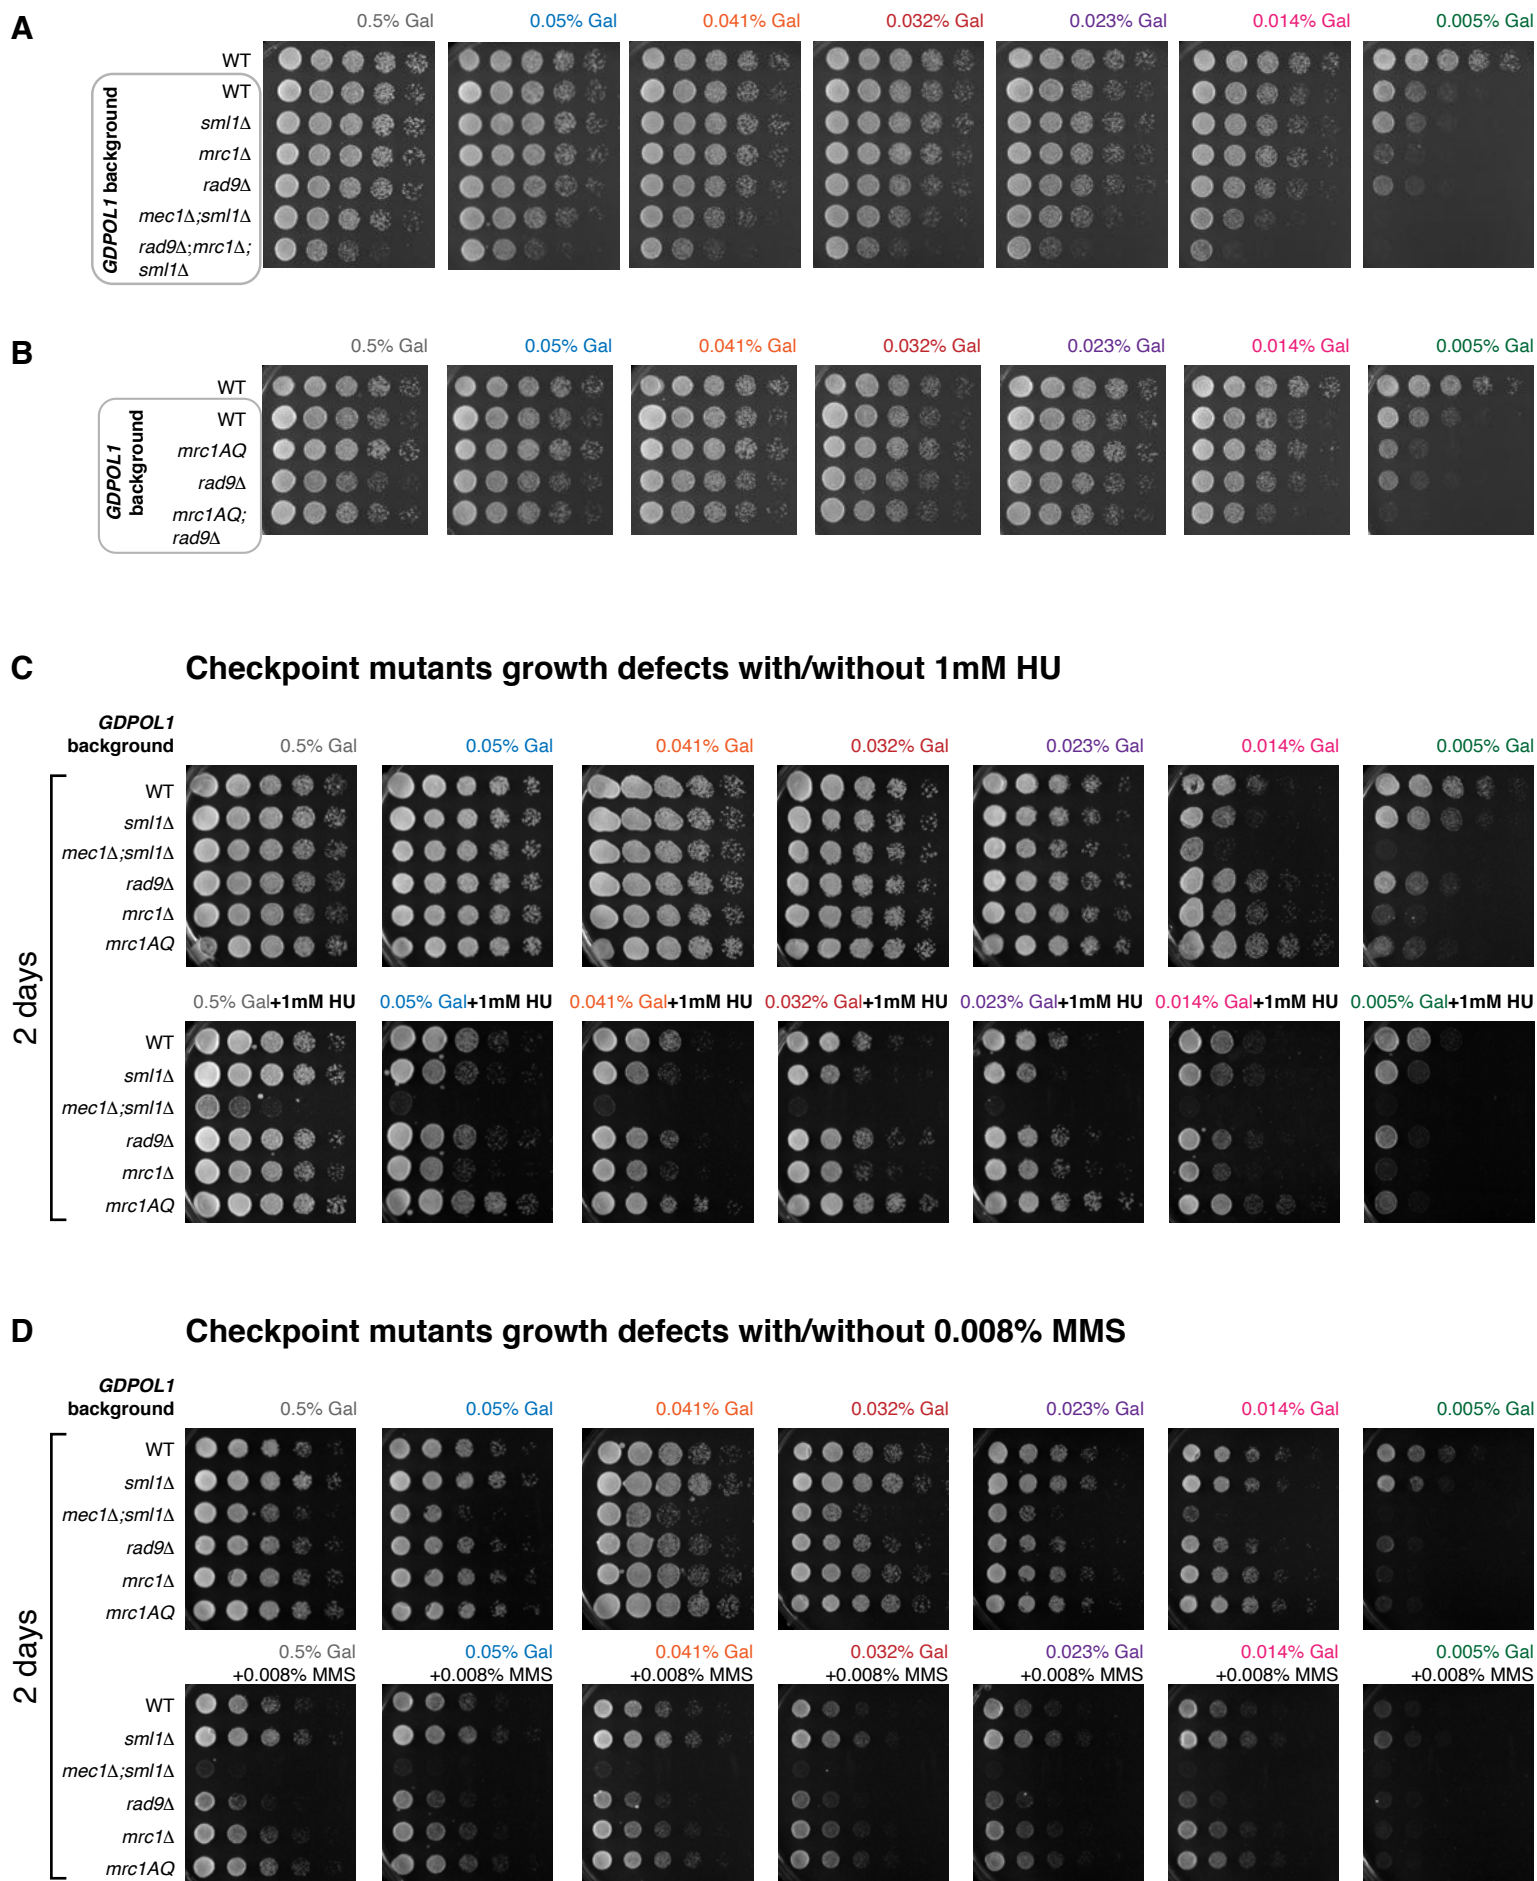

Source: https://www.biorxiv.org/content/10.1101/352567v3.full.pdf
